# Supplementary material for: Strain localized deformation variation of a small-scale ductile shear zone
Source: Copernicus journal article supplement (doi:10.5194/se-2022-2), 2022-01-25
Supplement: Supplementary file [file se-2022-2-RC1-supplement.pdf]

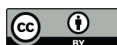

# Strain localized deformation variation of a small-scale ductile shear zone

Lefan Zhan<sup>1</sup>, Shuyun Cao<sup>\*1</sup>, Yanlong Dong<sup>1</sup>, Wenyuan Li<sup>1</sup>

<sup>1</sup>State Key Laboratory of Geological Processes and Mineral Resources, China University of Geosciences, Wuhan 430074, China

**Correspondence:** Shuyun Cao (Shuyun.cao@cug.edu.cn)

## Abstract:

A continental-scale strike-slip shear zone frequently presents a long-lasting deformation and physical expression of strain localization in a middle to lower crustal level. However, the deformation evolution of strain localization at a small-scale shear zone remains unclear. This study investigated <10 cm wide shear zones developing in undeformed granodiorites exposed at the boundary of the continental-scale Gaoligong strike-slip shear zone. The small-scale ductile shear zone demonstrated a typical transition from protomylonite, mylonite to extremely deformed ultramylonite, and decreased mineral size from coarse-grained aggregates to extremely fine-grained mixed phase. Shearing senses such as hornblende and feldspar porphyroclasts in the shear zone are the more significantly low-strain zone of mylonite. The microstructure and EBSD results revealed that the small-scale shear zone experienced ductile deformation under medium-high temperature conditions. Quartz aggregates suggested a consistent temperature with an irregular feature, exhibiting a dominated high-temperature prism <a>slip system. Additionally, coarse-grained aggregates in the mylonite of the shear zone were deformed predominantly by dislocation creep, while ultra-plastic flow by viscous grain boundary sliding was an essential deformation process in the extremely fine-grained (~50µm) mixed-phase of ultramylonite. Microstructural-derived strain rates calculated from quartz paleopiezometry were on the order of 10<sup>-15</sup> to 10<sup>-13</sup> s<sup>-1</sup> from low-strain mylonite to high strained ultramylonite. The localization and strain rate-limited process was fluid-assisted precipitation presenting transitions of compositions as hydrous retrogression of hornblende to mica during increasing deformation and exhumation. Furthermore, the potential occurrence of the small-scale shear zone was initiated at a deep-seated crustal dominated by the temperature-controlled formation and rheological weakening.

**Keywords:** strain localization, ductile deformation, ultramylonite, microstructure, EBSD texture, Gaoligong shear zone

## 1. Introduction

Many previous studies (e.g., field analysis, laboratory experiments, numerical

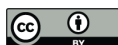

modeling, seismology, hydrogeology) have focused on describing and discussing the architecture, initiation mechanisms, and rock failure processes of the shear zone (Sibson, 1977; Scholz, 1980, 1989; Wintsch et al., 1995; Tikoff and de Saint Blanquat, 1997; Brown and Solar, 1998; Rosenberg, 2004; Mancktelow, 2008; Wibberley et al., 2008; Frost et al., 2011; Mancktelow and Pennacchioni, 2013; Cao and Neubauer, 2016; Fossen and Cavalcante, 2017; Menegon et al., 2017; Vannucchi, 2019; Fagereng and Beall, 2021). The shear zone is known that strain localizes into the tabular zone from small outcrop-size individual zone to large composite structure in the large-scale in the lithosphere (Fossen and Cavalcante, 2017). The continental-scale strike-slip shear zone commonly appears as long-standing zones of weakness in the crust, which extend across ductile lower crust (shear zone) through the brittle-ductile transition into brittle crust (fault zone) (Sibson, 1977; Scholz, 1980, 1989). The exhumed strike-slip shear zones at depth are crucial structural borders within or between major continental blocks influenced by lateral extrusion, recording the strain localization and regional kinematic history (Ratschbacher et al., 1991; Cunningham and Mann, 2007; Cao and Neubauer, 2016). Besides, nucleation and initiation of a continental-scale shear zone occur within the deep crust or even mantle lithosphere in a specific thermal-structural architecture, where temperature-controlled rheological weakening plays a critical role in localizing future strike-slip shear zone (Cao and Neubauer, 2016 and references therein). Although numerous studies have established the small-scale ( $10^{-3}$ – $10^{-1}$  m thick) ductile shear zones within massive host rocks, the distribution and significance of shear localization at small scales are controversial (e.g., Bons and Jessell, 1999; Mancktelow and Pennacchioni, 2005, 2020; Pennacchioni, 2005; Menegon and Pennacchioni, 2009; Pennacchioni and Zucchi, 2013; Pennacchioni and Mancktelow, 2018; Ceccato et al., 2020).

Experiments and models on the deformation of rocks have been proposed to explain the formation of shear zones in varied scales, including the lithosphere's strength, the external conditions such as temperature, pressure, and fluid content, and the fact that rocks' rheology depends on their composition and grain size (e.g., Evans, 2000; Faulkner and Rutter, 2001; Collettini et al., 2009; Bense et al., 2013; Cao and Neubauer, 2016; Fossen and Cavalcante, 2017; Liu, 2017). It is suggested that the small individual zones can grow into the large and composite shear zone networks by segment linkage as they accumulate strain and displacement (Pennacchioni, 2005; Vauchez et al., 2007; Ganade de Araujo et al., 2014; Fossen and Cavalcante, 2017). The case from the field-based study is inconsistent with argues the nucleation model of the shear zone by strain localization in a homogeneous rheological media based on random distributions of weak particles or through the dilation of the wing veins on either the compressed or extensional side (Mancktelow, 2002, 2008; Misra and Mandal, 2007; Wehrens et al., 2016; Nevitt and



Pollard, 2017; Nevitt et al., 2017; Pennacchioni and Mancktelow, 2018). Besides, the initial composition changes with fluid infiltration along and diffusion away from the discontinuities as pre-existing brittle fractures, bringing high significance to the types of developing shear zone (Mancktelow and Pennacchioni, 2005; Pennacchioni, 2005; Pennacchioni and Zucchi, 2013; Pennacchioni and Mancktelow, 2018). However, ongoing deformation and metamorphism can obliterate or reset any traces of such small-scale localization (Bons and Jessell, 1999). Therefore, the processes and mechanism of localizing in a small-scale shear zone are still unclear.

This study presents a detailed description of small-scale shear zones developing in unfoliated large intrusive granodiorite bodies at the boundary of the Gaoligong continental-scale shear zone (GLG-SZ) on the southeastern margin of the Tibetan Plateau. The new detail microstructural, EBSD texture, and geothermal data reveal that (1) strain localization in small-scale shear zones is characterized by the development of mylonite and ultramylonite with the increasing strain from rim to the center, (2) formation conditions and processes of the micro-shear zone are associated with the continental-scale GLG-SZ ductile shearing and exhumation.

## 2. Geological setting and field description

The southeastern margin of the Tibetan Plateau has been engaged in crustal thickening, tectonic compression, block rotation, and strike-slip shearing during the Cenozoic (Tapponnier and Molnar, 1977; Tapponnier et al., 1982, 1990) (Fig. 1). Several continental-scale strike-slip shear zones including the Gaoligong shear zone (GLG-SZ), the Chongshan-Biluoexuehan shear zone, and the Ailaoshan-Red River shear zone are developed in the Sanjiang region (Jinshajiang, Lancangjiang, and Nujiang) (Fig. 1). The formation of these strike-slip shear zones has been attributed to the Cenozoic continental collision of the India and Eurasia plates. The GLG-SZ is a narrow N-S trending belt with a width of 10 kilometers and a length of 600 kilometers, extending southward from the eastern Himalayan Syntaxis to the eastern Tengchong area and then extending southwestward to join the Sagaing fault zone (Fig. 1B). It serves as the boundary between the Tengchong and Baoshan blocks (Ji et al., 2000a; Zhang et al., 2012a, b; Liu et al., 2017; Dong et al., 2019; Tang et al., 2020). The Cambrian gneiss and the Neoproterozoic metamorphic units, named the Gaoligong metamorphic complex, represent the basement units in this area and evolve into the Gaoligong strike-slip shear zone along after the reactivation in Cenozoic (Wang et al., 2006; Wang et al., 2008; Zhang et al., 2012b; Zhu et al., 2017; Dong et al., 2019) (Fig. 1B). The main rock types are mylonitic gneisses (granitic gneisses and migmatitic gneisses) and schists, as well as amphibolites and marbles.

Along the GLG-SZ, a considerable number of Mesozoic and Cenozoic granitic rocks intrude into the Gaoligong metamorphic complex (Wang et al., 2006; Zhang et al.,



2018; Dong et al., 2019) (Fig. 1B). Recent zircon U-Pb and  $^{39}\text{Ar}/^{40}\text{Ar}$  chronological data revealed that both of the unfoliated and foliated granitic intrusions in the northwest part of the GLG-SZ has the emplaced ages of 112–125 Ma (Early Cretaceous) during the collision of the Lhasa and the Qiangtang blocks, post-magmatic melting timing of ca. 35 Ma (Early Oligocene), and subsequent cooling during the Middle Miocene (ca. 13 Ma) (Xu et al., 2012; Zhu et al., 2017; Dong et al., 2021). Two-stage tectono-thermal evolutions since the Late Cretaceous have also been proposed. Around 76–74 Ma, earlier regional metamorphism occurs in the high-pressure granulite facies owing to crustal thickening and magmatism. Around 24–23 Ma, the later stage was defined by amphibolite-greenschist facies conditions in connection with shearing deformation (Ji et al., 2000b; Song et al., 2010). The analysis of geochronological data from the Tengchong area suggests that the dome uplift and deep crustal material was exhumed during 32–10 Ma in the south of the GLG-SZ (Xu et al., 2015; Zhang et al., 2017; Dong et al., 2019).

Within the GLG-SZ, the high-grade rocks and most of the granitic intrusions within the GLG-SZ underwent the Cenozoic deformation of right-lateral strike-slip shear (Zhang et al., 2012b; Xu et al., 2015; Liu et al., 2017; Chiu et al., 2018; Dong et al., 2019) (Fig. 2A, B). The rocks demonstrate dominated characteristics of ductile deformation structures, including asymmetric folds, highly developed mylonitic lineation, fine-grained minerals, S-C fabrics, and shear bands (Dong et al., 2019). All shear sense indicators of  $\sigma$ - and  $\delta$ -porphyroclasts (Figs. 2A, B), as well as S-C fabrics and asymmetric folds, exhibit strong dextral shear. Mylonites are characterized with L>>S-type structures, in which the mineral stretching lineation is far more developed than mylonitic foliation (Fig. 2B). The foliation runs approximate N-S trending and dips moderately to steeply to the east (27–78°), while the lineation slightly dips to the north or south (<23°) (Fig. 1C; Dong et al., 2019).

This study emphasizes the small-scale shear zones newly observed within the unfoliated granodiorite at the western part of the GLG-SZ. The magmatic fabric of granodiorite is deficient in solid-state ductile deformation features and presents randomly arranged feldspar phenocrysts (Fig. 2). The small-scale shear zones have a thickness of approximately  $10^{-3}$ – $10^{-1}$ m. Most structures are steeply dipping, and the orientations are relatively disorderly (Fig. 1C).

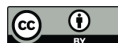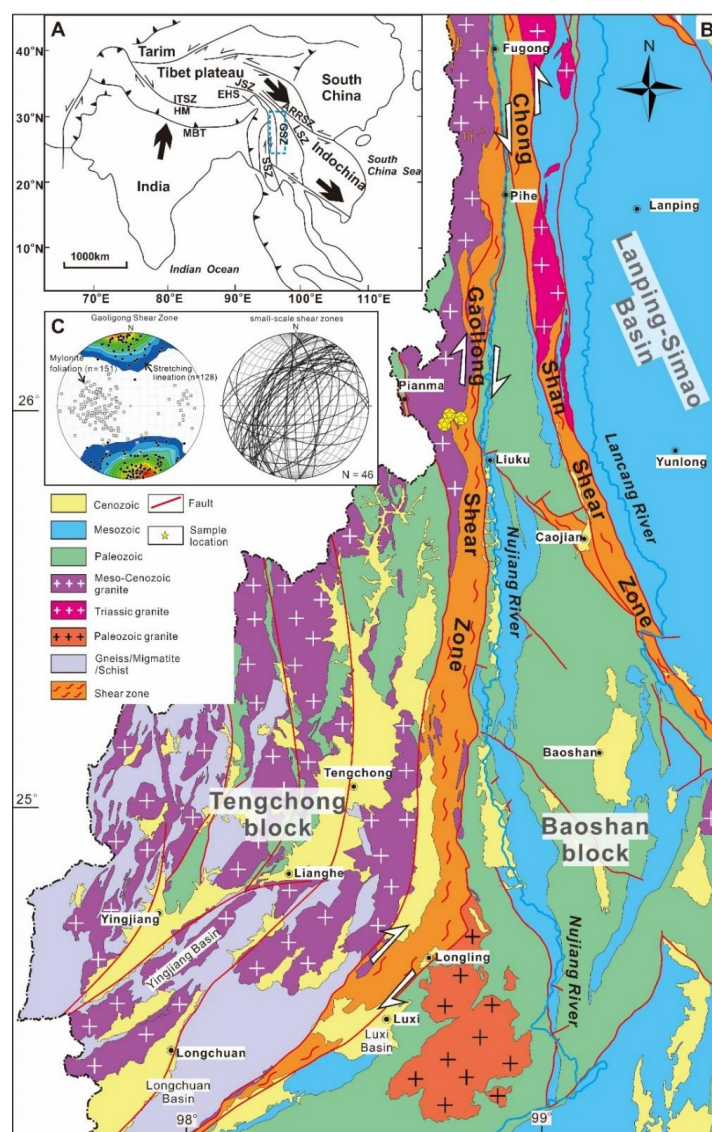

Fig.1. The Geological maps of the San Jiang region and the Gaoligong shear zone. (A) Regional tectonic map of the India-Eurasian plate. (B) Simplified geological map of the San Jiang region modified from Wang et al., 2008 and Dong et al., 2021; (C) Foliation and lineation data for GLG-SZ and the strikings of small-scale shear zones, plotted in stereographic projection (lower hemisphere). ARRSZ: Ailaoshan-Red River Shear Zone; EHS: Eastern Himalayan Syntaxis; GLG-SZ: Gaoligong shear zone; CSZ: Chongshan Shear Zone; JSZ: Jiali Shear Zone; SF: Sagaing fault.

### 3. Analytical methods



### 153 **3.1 Microscopy and cathodoluminescence**

154 Microstructure and petrology in the small-scale shear zone and granodiorite rock were  
 155 investigated in thin sections by optical and SEM, cathodoluminescence (CL) imaging,  
 156 and electron backscatter diffraction (EBSD). A Sigma 300VP field emission scanning  
 157 electron microscope (FEG-SEM) and BII CLF-2 Cathodoluminescence (CL) are  
 158 employed in the China University of Geosciences (Wuhan). CL operated at a voltage of  
 159 15KV, power consumption of 150 W, a current of 300 A, and a beam current of 1 mA  
 160 with a diameter of 30  $\mu\text{m}$ .

### 161 **3.2 Electron backscatter diffraction (EBSD)**

162 The Sigma 300VP FEG-SEM with a Symmetry EBSD (electron backscatter  
 163 diffraction) detector in China University of Geosciences (Wuhan) was applied to obtain  
 164 the mineral CPO. The highly polished thin sections with conductive tape attached to the  
 165 surface were put in the SEM chamber and rotated at a 70° tilt angle. Electron backscatter  
 166 patterns were acquired using the automatic mapping mode under the conditions of low  
 167 vacuum, with a detector distance of 193.1 mm, an acceleration voltage of 20 kV, and a  
 168 beam working distance of 15.6 mm. Indexing is considered acceptable when at least six  
 169 detected kikuchi bands correspond to those in the analyzed mineral phases' standard  
 170 reflector file. Following the completion of the test, the electron backscatter pattern  
 171 analysis was performed using the Aztec Crystal and HKL Channel 5. The pole figure of  
 172 representative CPO in samples was plotted in equal-area stereographic diagrams using  
 173 the lower hemisphere projection and the base circle represents the X-Z plane parallel to  
 174 the lineation and vertical to the foliation. Automated orientation maps revealed  
 175 systematic not-indexing, and such data were replaced with zero solution pixels.

### 176 **3.3 EPMA methodology**

177 Compositional data of unfoliated granitoids and foliated granitic rocks were  
 178 measured on a JEOL electron microprobe (JXA-8600) with a wavelength dispersive  
 179 system at the Department of Geography and Geology, University of Salzburg. Measuring  
 180 conditions using a focused electron beam involved a 15 kV acceleration voltage and a  
 181 40 nA sample current. The calibration of the microprobe was performed based on natural  
 182 silicates and synthetic oxides standards. The matrix correction for quantitative analysis  
 183 was conducted by the ZAF oxide method for most silicate minerals. The detection limits  
 184 ( $2\sigma$ ) are 0.06 wt% and 0.04 wt% for Si and Al, respectively, and are 0.025 wt% for Na,  
 185 K, Mg, Mn, and Fe.

## 186 **4. Deformed characteristics of granodiorites and small-scale shear zones**

### 187 **4.1 Mesoscale structures of granodiorites and small-scale shear zones**

188 As mentioned above, the GLG-SZ exposed widespread granitic intrusions of  
 189 various ages (Fig. 1B) (Zhang et al., 2017; Zhu et al., 2017; Chiu et al., 2018; Zhang et



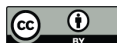

190 al., 2018; Tang et al., 2020; Dong et al., 2021). Most granitic intrusions underwent strong  
191 mylonitization within the GLG-SZ. Notably, the unfoliated granodiorites were exposed  
192 at the western boundary of the GLG-SZ. The major body of the studied granodiorites  
193 exhibits little macroscopic evidence of solid-state deformation-metamorphism, and  
194 igneous relationships are well preserved (Fig. 2C-H).

195 The granodiorites present strain localization on a network of different types of  
196 small-scale shear zones with a thickness of approximately  $10^{-3}$ – $10^{-1}$  m. They are  
197 invariably localized on approximately planar structural and compositional  
198 heterogeneities within the protolith (Fig. 2C, D). The small-scale shear zones exhibit  
199 significant ductile and/or brittle deformation characteristics. Regarding centimeter-scale  
200 or decimeter-scale shear zones, the strain is strongly localized in a narrow band, and  
201 minerals are elongated directionally in the outcrop scale (Fig. 2C, D). Most structural and  
202 compositional heterogeneities demonstrate a nearly horizontal stretching lineation and  
203 extremely fine-grained minerals of ductile shearing. The enclaves occur in the  
204 granodiorites crosscut by isolated, knife-sharp (<1–3 mm wide) brittle fractures, and may  
205 have a strike length of many tens of meters (Fig. 2G). The brittle fractures are typically  
206 identified by a dark biotite-rich slit. Most of these reflect displacement discontinuities in  
207 the outcrop scale. For example, cross-cut markers (e.g., mafic enclaves) are severely  
208 truncated and displaced by the shear zones without any dragging effect (Fig. 2G, H).  
209 Some display bands and several centimeters wide of a sigmoidal-shaped foliation of  
210 ductile shearing, implying a dextral sense of shear (Fig. 2F, H).

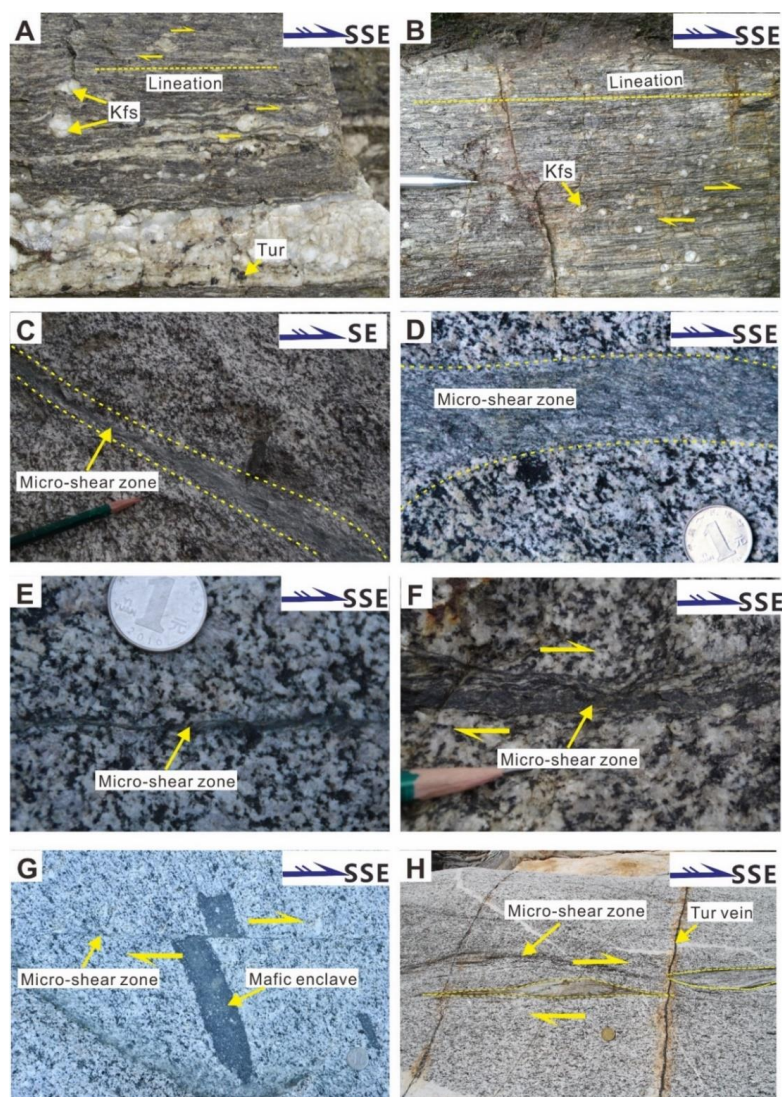

211  
 212 *Fig.2. Field structures of the GLG-SZ and small-scale shear zones. (A)-(B) Some*  
 213 *representative deformation structures of the GLG-SZ in the XZ plane (the plane parallel*  
 214 *to the lineation and vertical to the foliation). (C)-(D) Ductile shear zones in the*  
 215 *centimeter-scale/ decimeter-scale. (E) millimeter-scale ductile shear zones are like joints*  
 216 *in the outcrop scale. (F) millimeter-scale shear zones form a sigmoidal-shaped foliation*  
 217 *at the shear zone boundaries. (G)-(H) Dextral offset of some crosscut markers across*  
 218 *millimeter-scale shear zones.*

219

## 220 4.2 Microstructures of unfoliated granodiorite





221 The unfoliated granodioritic host rocks are composed of quartz (16–19 vol%), K-  
 222 feldspar (17–19 vol%), plagioclase (~59–63 vol%), hornblende (~7 vol%), and biotite  
 223 (2–3 vol%). The unfoliated granodioritic exhibits little evidence of ductile deformation.  
 224 Feldspar and hornblende grains both primarily consist of euhedral to subhedral coarse  
 225 grains and **form with microfracture** (Fig. 3A). The coarse-grained feldspar grains are  
 226 dominated by plagioclase and tiny amounts of K-feldspar. The plagioclase (up to several  
 227 millimeters in length) has significant polysynthetic twinning and ring or zoning magma  
 228 structure that grows fine-grained inclusions of biotite and quartz grains (Fig. 3A). The  
 229 crystal sizes of hornblende are about 0.5–5 mm, **and the grains develop two groups of**  
 230 **cleavages** (Fig. 3B). Quartz grains present polycrystal aggregates, which are mostly  
 231 xenomorphic around the plagioclase grains. The biotite grains demonstrate the features  
 232 of an undeformed or only slightly bent shape with magmatic phase (Fig. 3C).

#### 233 4.3 Microstructures of the small-scale shear zone

234 Under the microscope, the small-scale shear zone developing in the granodiorite  
 235 ~~has dramatical~~ shearing banding, reflecting a transition deformation characteristic from  
 236 protolith to ultramylonite. The mineral grain size gradually decreases from rim to center,  
 237 with a strong strain gradient. According to the different grains size, three distinct  
 238 deformed microstructure zones can be recognized (Fig. 3): Zone A with relatively close  
 239 to the outer/rim low strain portions (Fig. 3D), high fine-grained Zone B of traversing into  
 240 the shear zones, and strong fine-grained Zone C in the center of the shear zone.

241 Zone A in the small-scale shear zone is of the **rim outer relative low strain portions**,  
 242 composed of plagioclase, K-feldspar, biotite, quartz, and a small amount of apatite. **It**  
 243 **presents the characteristics of protomylonite**. The coarse-grained plagioclase, K-feldspar,  
 244 and hornblende **are well preserved**. The fine-grained quartz grains form polycrystal  
 245 aggregate ribbons. The borders of quartz grains exhibit various morphologies, ranging  
 246 from slightly curved to serrated (Fig. 3C), suggesting characteristics of dynamic  
 247 recrystallization by grain boundary migration (GBM). The large plagioclase grains  
 248 develop mechanical twins and fractures locally. Some of the fractures of plagioclase  
 249 crosscutting the grains are filled by quartz (Fig. 3C).

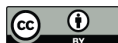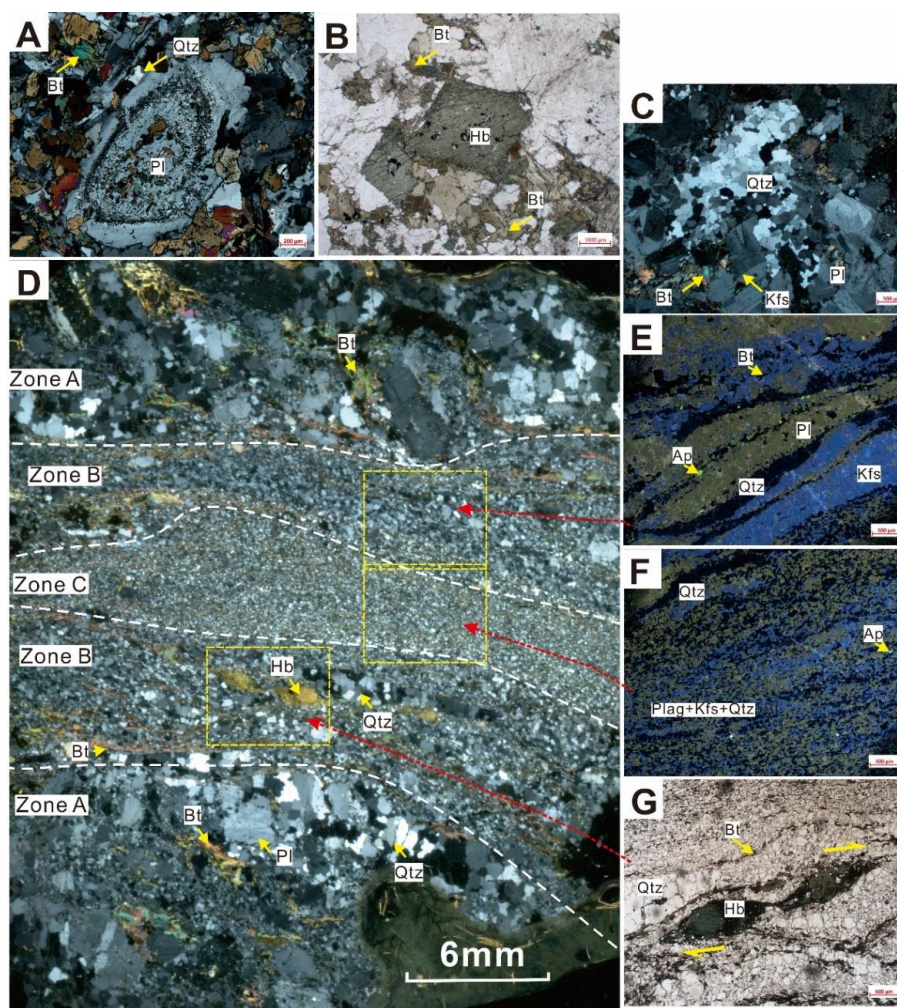

Fig.3. Microscopic deformation characteristics of unfoliated granodiorite and small-scale shear zones. (A) Ring or zoned structure of plagioclase in the unfoliated granodiorite. (B) The euhedral to subhedral hornblende crystals in the unfoliated granodiorite s. (C) quartz-rich aggregates and feldspar porphyroclast with mechanical twinning and fractures in the Zone A of shear zone. (D) Thin section scanning of small-scale shear zone. (E) Fine-grained layers in the Zone B. (F) The mixed-phase zone in the Zone C of shear zone. (G) The residual hornblende grains indicating right-lateral shearing in the Zone B of shear zone. Fig. (B), (G) are plane polarized light micrographs, (A), (C) and (D) are cross-polarized light micrographs and (E), (F) are cathodoluminescence (CL) images. Qtz: quartz, Pl: plagioclase, Kfs: K-feldspar, Bt: biotite, Hb: hornblende, Ap: apatite.



263 Under the SEM observation, the BSE images reveal a characteristic core-mantle  
 264 structure in the K-feldspar porphyroclasts surrounded by fine grains or subgrains (Fig.  
 265 4A, average length 760  $\mu\text{m}$ ). The long axes of porphyroclasts are parallel or oblique to  
 266 the shear zone. Myrmekites develop at the rim of the K-feldspar porphyroclasts.  
 267 Neocrystallization quartz grains (average length 45  $\mu\text{m}$ , Fig 4B) within myrmekites are  
 268 elongated vertical to the long axis of K-feldspar porphyroclasts. Neocrystallization  
 269 plagioclase grains (average length of  $\sim 60$   $\mu\text{m}$ ) within the myrmekites are equiaxed. The  
 270 fine-grained quartz and plagioclase grains nucleate around K-feldspar porphyroclasts  
 271 (Fig. 4A, B). The mica grains (average length 10  $\mu\text{m}$ ) are long-prismatic and plate-  
 272 prismatic, slenderer than these in the main body of granodiorite (Fig. 3C, D). Several  
 273 mica pieces are parallel to each other, and they cut across quartz aggregates or locate in  
 274 the edge of aggregates (Fig. 3C, D). Some newly formed micas precipitate in the  
 275 fractures of plagioclase grains and the grain boundaries of quartz aggregates (Fig. 3D).

276 The deformed Zone B is the most prominent characteristic of the mylonites with  
 277 the porphyroclasts (feldspar and hornblende) embedded in a fine-grained matrix (Fig.  
 278 3D, E). The feldspar porphyroclasts are smaller in size compared to Zone A, with the  
 279 features of elongated and lenticular, as well as irregular and serrated grain boundaries.  
 280 Inhomogeneous extinctions of porphyroclastic feldspar grains are apparent, indicating  
 281 plastic deformation. The elongated hornblende porphyroclasts form the mineral fish  
 282 fabrics, presenting a dextral sense of shear (Fig. 3D, G). Locally, the quartz grains form  
 283 typical polygonal aggregates, with the long axis parallel to or subparallel to the major  
 284 stretching lineation in the small-scale shear zone. The matrix consists of plagioclase, K-  
 285 feldspar, quartz, and biotite, containing a minor content of apatite. The mineral phases in  
 286 the fine-grained matrix are not homogeneously mixed. Instead, the layering of  
 287 compositions can be observed (Fig. 3E). Those layered aggregates of minerals exhibit an  
 288 orientation roughly parallel to the mylonitic foliation.

289 The BSE images imply that the K-feldspar layers are composed of many small  
 290 aggregates of fine-grained quartz and plagioclase (Fig. 4D, E). The same situation can  
 291 be observed in the plagioclase layers (Fig. 4D, F). Additionally, some small grains of  
 292 mica are distributed in the plagioclase grain boundaries as rod-like cross-sections (Fig.  
 293 4F). In contrast to the quartz-rich aggregates in Zone A, the quartz aggregates in Zone B  
 294 are not bulk but layered (Fig. 3E). The grain boundary of quartz is irregular. Moreover,  
 295 many relatively small, recrystallized quartz grains are mixed with K-feldspar, plagioclase,  
 296 and biotite in the matrix at the edge of the aggregates (Fig. 4D). In the quartz-rich layers,  
 297 isolated K-feldspar grains exist at triple junctions of quartz grains, and some small grains  
 298 of biotite are distributed in the grain boundary (Fig. 4D). Except for the small grains in  
 299 the quartz grain boundary, most biotite grains are highly elongated subparallel to the  
 300 foliation and form biotite-rich layers (Fig. 3G).



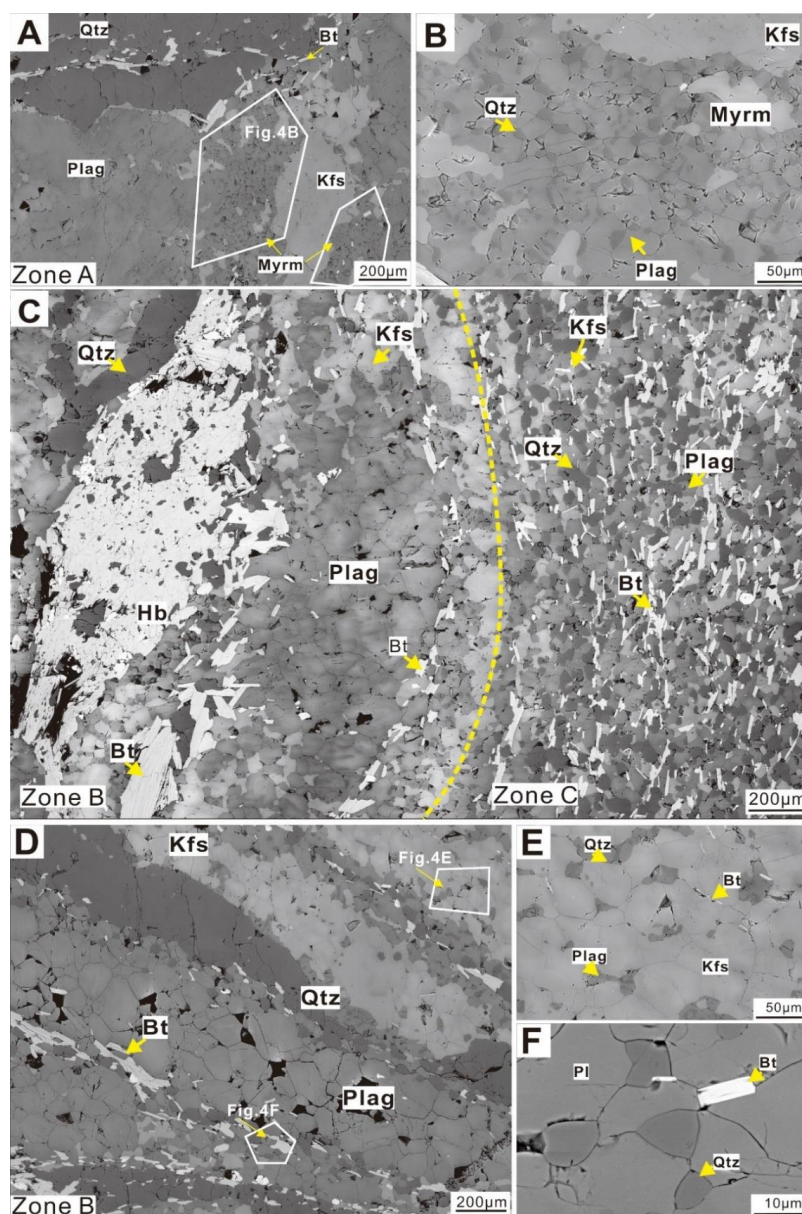

Fig.4. SEM-BSE images of small-scale shear zone. (A)-(B) Quartz and Plagioclase irregular aggregates and the nucleation of fine-grained quartz and plagioclase grains around K-feldspar clasts in the Zone A. (C) The transition area from Zone B to Zone C. (D) Fine-grained layers in the Zone B. (E) The nucleation of fine-grained quartz and plagioclase grains in K-feldspar-rich layers in the Zone B. (F) The nucleation of fine-grained quartz in plagioclase -rich layers in the Zone B.



Zone C presents the dominated characteristics of ultramylonites composed of extreme fine-grained matrix and only a few feldspar porphyroclasts with irregular grain boundaries. The hornblende disappears. Zone C is microstructurally more homogeneous than the other two zones and consists of fine-grained K-feldspar and plagioclase grains (Fig. 3D, F). The fine-grained grains of feldspar, quartz, and mica are slightly elongate or sub-equant. The feldspar porphyroclasts have disappeared. Quartz grains are disseminated throughout the matrix, and the residual quartz-quartz grain boundaries are more straight compared with those in the quartz aggregates in Zone A or Zone B (Fig. 4C). Phase boundaries between quartz and plagioclase or K-feldspar are frequently extensively curved. The biotite grains distribute homogeneously in the matrix and are extremely elongated subparallel to the foliation (Fig. 3F, 4C).

#### 4.4 Mineral grain sizes of the small-scale shear zone

The grain size significantly decreases as the strain increases from Zone A to Zone C. The software Image J is adopted to count the size of grains by manual operation.

In Zone A, the quartz grain sizes in the quartz-rich aggregates are counted. The mean and median grain sizes are 186  $\mu\text{m}$  and 173  $\mu\text{m}$ , respectively (Fig. 5B, C). In Zone B, the mean and median grain sizes are 88  $\mu\text{m}$  and 80  $\mu\text{m}$ , respectively (Fig. 5B, C). In the weakly deformed domains (Zone A), a relatively broad distribution of grain size can be observed, while a rather narrow distribution of grain size is observed in Zone B, (Fig. 5C). In Zone A and Zone B, larger grain sizes correspond to the grains without recrystallization or recrystallization relict in the quartz-rich aggregates, and the smaller grain sizes correspond to the small, neocrystallized quartz grains in the quartz-rich aggregates or matrix at the edge of the aggregates. In Zone C, the mean diameter of quartz grains is reduced to 44  $\mu\text{m}$ , and it has the narrowest distribution among the three zones (Fig. 5B, C).

The distribution of plagioclase grain size has a wide range from 80 to 1000 in Zone A (Fig. 5C). The mean and median values of plagioclase grain size are 225  $\mu\text{m}$  and 169  $\mu\text{m}$ , respectively (Fig. 5B, C). In the box plot, the outliers represent large feldspar porphyroclasts. Therefore, a considerable amount of plagioclase porphyroclasts occurs in Zone A (Fig. 5C). In Zone B, the plagioclase grain size decreases dramatically. The mean and median values of plagioclase grain size are 103  $\mu\text{m}$  and 101  $\mu\text{m}$  in Zone B, respectively (Fig. 5B, C). The distribution of plagioclase grain size in Zone B is much narrower than the distribution of plagioclase grain size in Zone A. The outliers in the box plot suggest that the amount of plagioclase porphyroclasts significantly decreases in Zone B (Fig. 5C). In Zone C, the mean and median diameters of plagioclase grains are reduced to 65  $\mu\text{m}$  and 63  $\mu\text{m}$ , respectively. Meanwhile, it has the narrowest distribution in the three zones, and there are hardly any plagioclase porphyroclasts (Fig. 5B, C).

Generally, the feldspar grain size is larger than the quartz grain size in all three





347 zones. The mean and median values of K-feldspar grain size are 165  $\mu\text{m}$  and is 145  $\mu\text{m}$   
348 in Zone A, respectively (Fig. 5B, C). The distribution of K-feldspar grain size is similar  
349 to the distribution of quartz grain size in Zone A. In Zone B, the mean and median values  
350 of K-feldspar grain size are all 97  $\mu\text{m}$ . The distribution of K-feldspar grain size in Zone  
351 B is narrower than the distribution of K-feldspar grain size in Zone A. The outliers in the  
352 box plot reflect that the amount of K-feldspar porphyroclasts significantly decreases in  
353 Zone B (Fig. 5B, C). In Zone C, it has the narrowest distribution in the three zones, and  
354 there are hardly any K-feldspar porphyroclasts. The mean and median values of K-  
355 feldspar grain size are 60  $\mu\text{m}$  and 59  $\mu\text{m}$ , respectively (Fig. 5B, C).

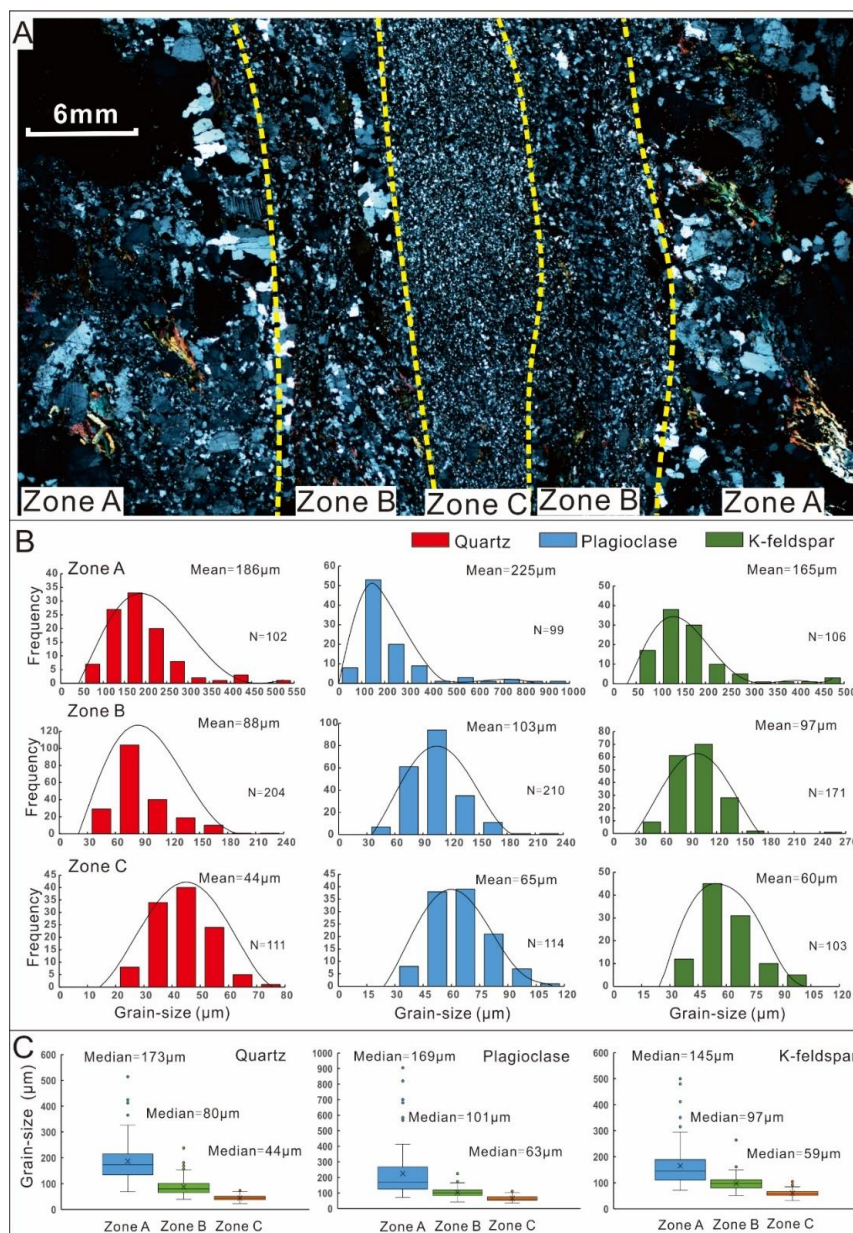

356  
 357 Fig.5. Mineral grain size evolution in the small-scale shear zone. (A) Thin-section  
 358 scanning of small-scale shear zone. cross-polarized light micrographs. (B) Grain size  
 359 distribution diagram of minerals in Zone A, B and C of small-scale shear zone. (C) The  
 360 box-and-whisker diagram illustrates the results. Individual boxes were determined by  
 361 their upper and lower quartiles, and the median was defined inside them. This  
 362 progression of grain size is derived from CL pictures.

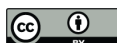

363

## 364 5. Mineral EBSD analysis in the small-scale shear zone

365 CPOs of quartz and feldspar were investigated mainly on the three zones (Zones A,  
 366 B, and C) of the micro-shear zone to further constrain the deformation conditions of the  
 367 small-scale shear zones. The results are illustrated in equal-area lower-hemisphere pole  
 368 figures.

### 369 5.1 Quartz and feldspar aggregates in the Zone A

370 In Zone A, the quartz grains mainly formed irregular polycrystalline aggregates,  
 371 and Dauphiné twins are occasionally observed in it (Fig. 6A). The pole figure of  $c$ - $\langle 0001 \rangle$   
 372 axis exhibits a well-developed point maximum near the Y-axis, with a maximum value  
 373 of multiples of uniform distribution (MUD) of  $\sim 6.42$ . The pole figures of  $m$ -(10-10) and  
 374  $a$ -(11-20) planes present a weaker girdle close to the XZ plane (Fig. 6B). In the sample  
 375 coordinate system (SCS), the low angle ( $2^\circ$ - $15^\circ$  in this article) rotation axes demonstrate  
 376 high spatial density close to the Y-axis, consistent with the pole figure of the  $c$ -axis (Fig.  
 377 6C). The low angle rotation axes indicate high spatial density close to the  $c$ -axis in the  
 378 crystal coordinate system (CCS; Fig. 6C). In the misorientation angle distribution  
 379 histogram, the relative frequency of misorientation angles less than  $15^\circ$  is around 0.08,  
 380 and the relative frequency of misorientation angle of  $60^\circ$  is around 0.13 in the corrected  
 381 pairs (Fig. 9A). The misorientation angle distribution of the uncorrected pairs exhibits  
 382 an irrelevance with the calculated random distribution curve (Fig. 9A).

383 The K-feldspar porphyroclasts gather into aggregates and are surrounded by large  
 384 quantities of small quartz and plagioclase grains in Zone A (Fig. 6A). The pole figure of  
 385 K-feldspar reveals a low maximum value of MUD, which is 2.69. The (100) plane forms  
 386 two maxima in the  $z$ -axis, while the pole figures of (010) and (001) planes form a point  
 387 maximum in the direction with a low angle to the  $x$ -axis (Fig. 6B). Although the rotation  
 388 axes present a point maximum between the  $X$ - and  $Z$ -axis in the SCS and a point  
 389 maximum close to the  $\langle 001 \rangle$ -axis in the CCS, a clear clustering is not observed in the  
 390 low angle rotation axis distributions of K-feldspar (Fig. 6C). In the misorientation angle  
 391 distribution histogram, the distribution of misorientation angles of corrected pairs is  
 392 uniform except  $<15^\circ$  and  $180^\circ$ , whose relative frequencies are much high than other  
 393 angles. The misorientation angle distribution of the uncorrected pairs reveals a positive  
 394 correlation with the calculated random distribution curve (Fig. 9B).

395 The shape of plagioclase grains is regular, and Albite twins are common in the  
 396 plagioclase grains in Zone A (Fig. 6A). The pole figure of plagioclase suggests a low  
 397 maximum value of MUD, which is 2.23. The plagioclase and K-feldspar have similar  
 398 crystallographic orientations in the (001) plane. The (010) plane forms a maximum



399 between the X- and Z-axis, and the (100) plane presents high spatial density near the Y  
 400 direction (Fig. 6B). In the SCS, the low angle rotation axes demonstrate high spatial  
 401 density in the position between the X- and Z-axis, and the low angle rotation axes reflect  
 402 high spatial density close to the  $\langle 100 \rangle$ -axis in the CCS. The low angle rotation axis  
 403 distributions of plagioclase are also disorderly similar to K-feldspar's (Fig. 6C). In the  
 404 misorientation angle distribution histogram, the misorientation angle of  $180^\circ$  has the  
 405 highest relative frequency of around 0.15 in the corrected pairs. The misorientation angle  
 406 distribution of the uncorrected pairs exhibits a positive correlation with the calculated  
 407 random distribution curve. ~~The difference is that the random distribution curve~~  
 408 ~~rises linearly (Fig. 9C).~~

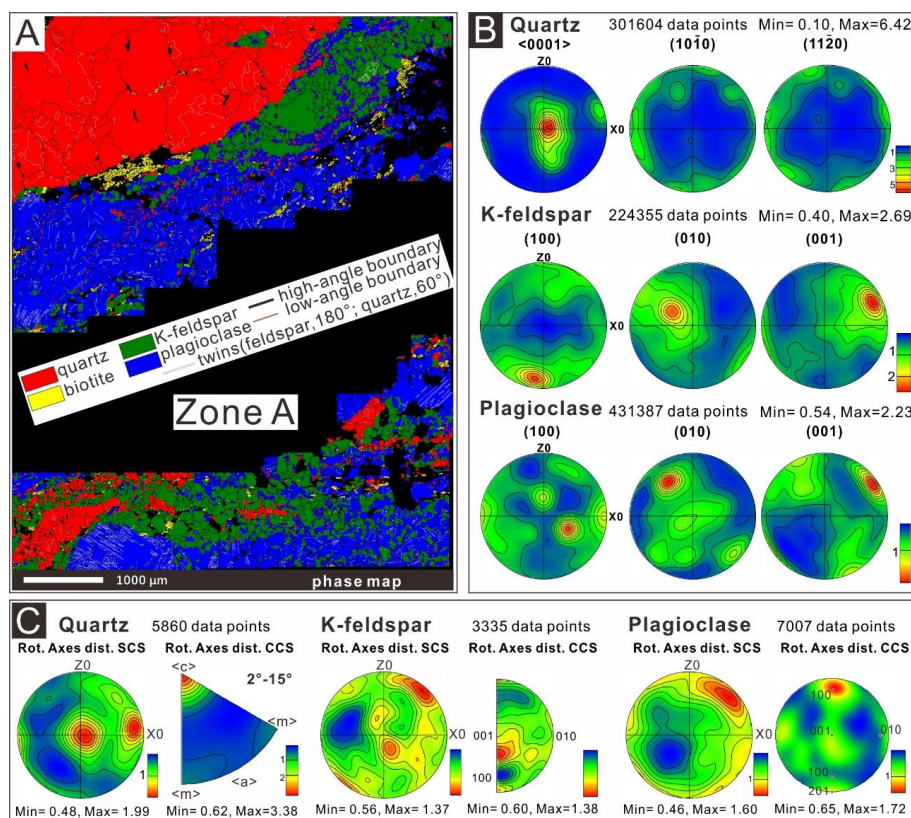

409  
 410 Fig. 6. EBSD map and Quartz, K-feldspar and plagioclase crystallographic orientation  
 411 data in the Zone A. (A) EBSD phase map and grain boundary map. (B) Contoured pole  
 412 figures of quartz, K-feldspar, and plagioclase. (C) Rotation axes of  $2^\circ$ - $15^\circ$  distributions  
 413 for quartz, K-feldspar, and plagioclase in sample and crystal coordinate system. The  
 414 pole figures are plotted as one point per pixel. The pole figures and Rotation axes  
 415 distributions are projected to XZ plane at half width  $25^\circ$ , data clustering  $5^\circ$ . Red color  
 416 marks maxima, also given as multiples of the uniform distribution.



417

## 418 5.2 Quartz ribbons and feldspar layers in the Zone B

419 In Zone B, the quartz irregular polycrystalline aggregates have disintegrated, and  
 420 the content of quartz in the matrix is higher than those in Zone A (Fig. 7A). The pole  
 421 figure of the c-axis reveals a well-developed point maximum in the Y-axis, with the  
 422 maximum value of MUD of ~5.33. The pole figures of m- and a-plane show a weaker  
 423 girdle in the XZ plane (Fig. 7B). In the SCS, the low angle rotation axes suggest high  
 424 spatial density close to the Y-axis, similar to the pole figure of the c-axis (Fig. 6H). The  
 425 low angle rotation axes exhibit high spatial density close to the c-axis in the CCS (Fig.  
 426 7C). In the misorientation angle distribution histogram, the relative frequency of the  
 427 corrected pairs' misorientation angles ( $<15^\circ$ ) is also around 0.08, while the relative  
 428 frequency of misorientation angles ( $60^\circ$ ) is around 0.12, which is less than the value in  
 429 the Zone A. The misorientation angle distribution of the uncorrected pairs presents a  
 430 negative correlation with the calculated random distribution curve (Fig. 9A).

431 In Zone B, the K-feldspar porphyroclasts are hardly observed, and the smaller  
 432 grains gather into K-feldspar layers (Fig. 7A). The pole figure of K-feldspar reveals a  
 433 low maximum value of MUD of ~2.14. The pole figure of the (100) plane forms a point  
 434 maximum near the X-axis. The pole figures of (010) and (001) planes present weak  
 435 patterns (Fig. 7B). The low angle rotation distributions indicate very scattered data, and  
 436 the quantity of data points reduces to 70% compared to Zone A (Fig. 7C). The  
 437 distribution of misorientation angles is also in line with those in Zone A, while the  
 438 relative frequency of  $<15^\circ$  and  $180^\circ$  is lower in the corrected pairs. The misorientation  
 439 angle distribution of the uncorrected pairs exhibits a positive correlation with the  
 440 calculated random distribution curve (Fig. 9B).

441 The pole figure of plagioclase reveals a low maximum value of MUD of ~1.90. The  
 442 pole figure of the (001) plane forms maxima between the X- and Z-axis, and the pole  
 443 figures of (100) and (010) planes present weak patterns (Fig. 7B). The low angle rotation  
 444 distributions also indicate very scattered data, and the quantity of data points decreases  
 445 to 40% compared with that of Zone A (Fig. 7C). The distribution of misorientation angles  
 446 is consistent with those in Zone A, while the relative frequency of  $180^\circ$  is lower in the  
 447 corrected pairs. The misorientation angle distribution of the uncorrected pairs  
 448 demonstrates a positive correlation with the calculated random distribution curve.  
 449 Besides, the random distribution curve rises linearly (Fig. 9C).



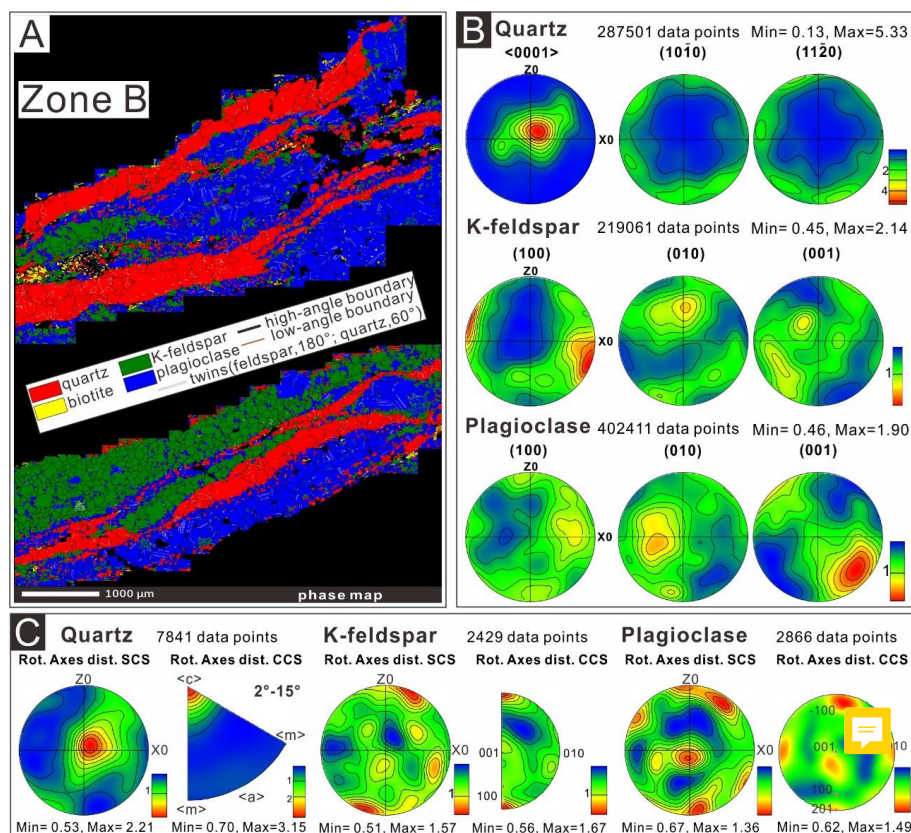

Fig. 7. EBSD map and Quartz, K-feldspar and plagioclase crystallographic orientation data in the Zone B. (A) EBSD phase map and grain boundary map. (B) Contoured pole figures of quartz, K-feldspar, and plagioclase. (C) Rotation axes of 2°-15° distributions for quartz, K-feldspar, and plagioclase in sample and crystal coordinate system. The pole figures are plotted as one point per pixel. The pole figures and Rotation axes distributions are projected to XZ plane at half width 25°, data clustering 5°. Red color marks maxima, also given as multiples of the uniform distribution.

### 5.3 Mixed matrix of quartz and feldspar in the Zone C

In Zone C, the quartz grains are completely disseminated among the other matrix phases (Fig. 8A). The pole figures suggest a low maximum value of MUD of ~1.50. A clear clustering is not observed in the pole figure of the c-axis. The pole figures of m- and a-plane present a weak and wide girdle in the XZ plane (Fig. 8B). The low angle rotation axes exhibit a maximum close to the c-axis in the CCS, while it is much weaker compared with Zones A and B (Fig. 8C). In the misorientation angle distribution histogram, the relative frequency of the corrected pairs' misorientation angles (<15°)



467 drops to 0.04, and the relative frequency of misorientation angles ( $60^\circ$ ) decreases to 0.08.  
 468 The misorientation angle distribution of the **uncorrected** pairs displays a positive  
 469 correlation with the calculated random distribution curve (Fig. 9A).

470 The feldspar grains are mixed with quartz grains in Zone C (Fig. 8A). The pole figure  
 471 of K-feldspar reveals a low maximum value of MUD of  $\sim 1.67$  (Fig. 8B). The low angle  
 472 rotation distributions also suggest very scattered data without a clear clustering (Fig. 8C).  
 473 In the misorientation angle distribution histogram of **corrected** pairs, the relative  
 474 frequency of misorientation angles ( $180^\circ$ ) is low. The misorientation angle distribution  
 475 of the **uncorrected** pairs exhibits a positive correlation with the calculated random  
 476 distribution curve (Fig. 9B). The pole figure of plagioclase demonstrates a low maximum  
 477 value of MUD of  $\sim 2.37$ . The feature of the pole figure of the (001) plane is consistent  
 478 with that in Zone B (Fig. 8B). However, the low angle rotation distributions reflect few  
 479 scattered data (Fig. 8C). The relative frequency of misorientation angles ( $180^\circ$ ) is around  
 480 0.10 in the misorientation angle distribution of **corrected** pairs. The **uncorrected** pairs  
 481 present a positive correlation with the calculated random distribution curve. Additionally,  
 482 the random distribution curve also rises linearly (Fig. 9C).

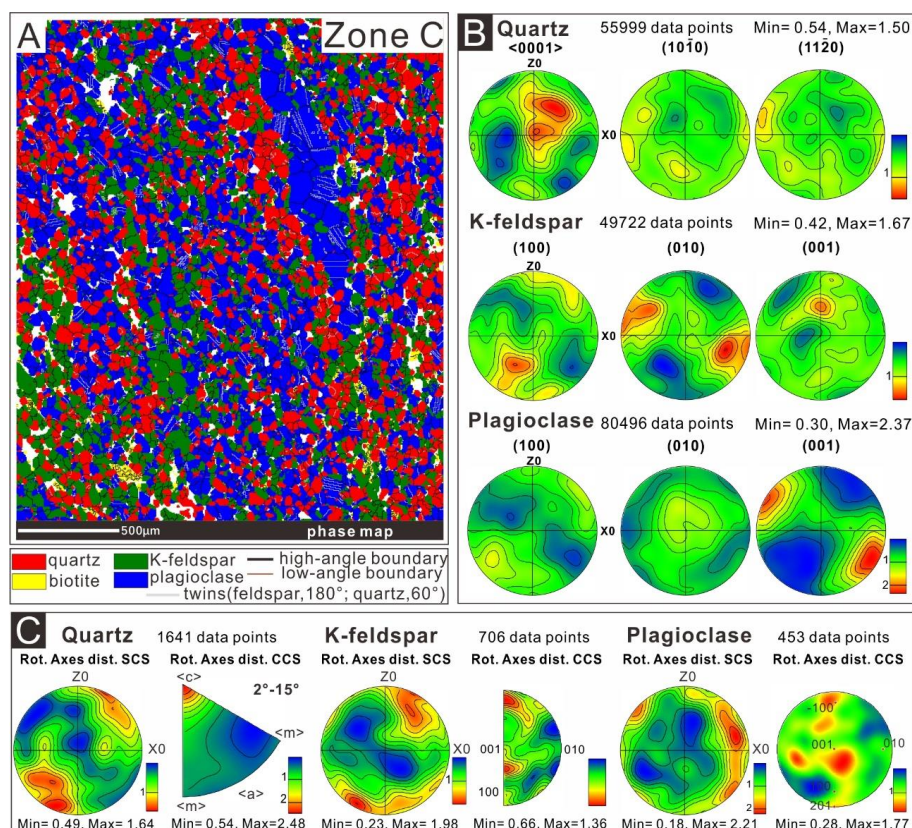

483 Fig. 8. EBSD map and Quartz, K-feldspar and plagioclase crystallographic orientation  
 484

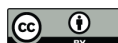

485 data in the Zone B. (A) EBSD phase map and grain boundary map. (B) Contoured pole  
 486 figures of quartz, K-feldspar, and plagioclase. (C) Rotation axes of 2°-15° distributions  
 487 for quartz, K-feldspar, and plagioclase in sample and crystal coordinate system. The  
 488 pole figures are plotted as one point per pixel. The pole figures and Rotation axes  
 489 distributions are projected to XZ plane at half width 25°, data clustering 5°. Red color  
 490 marks maxima, also given as multiples of the uniform distribution.

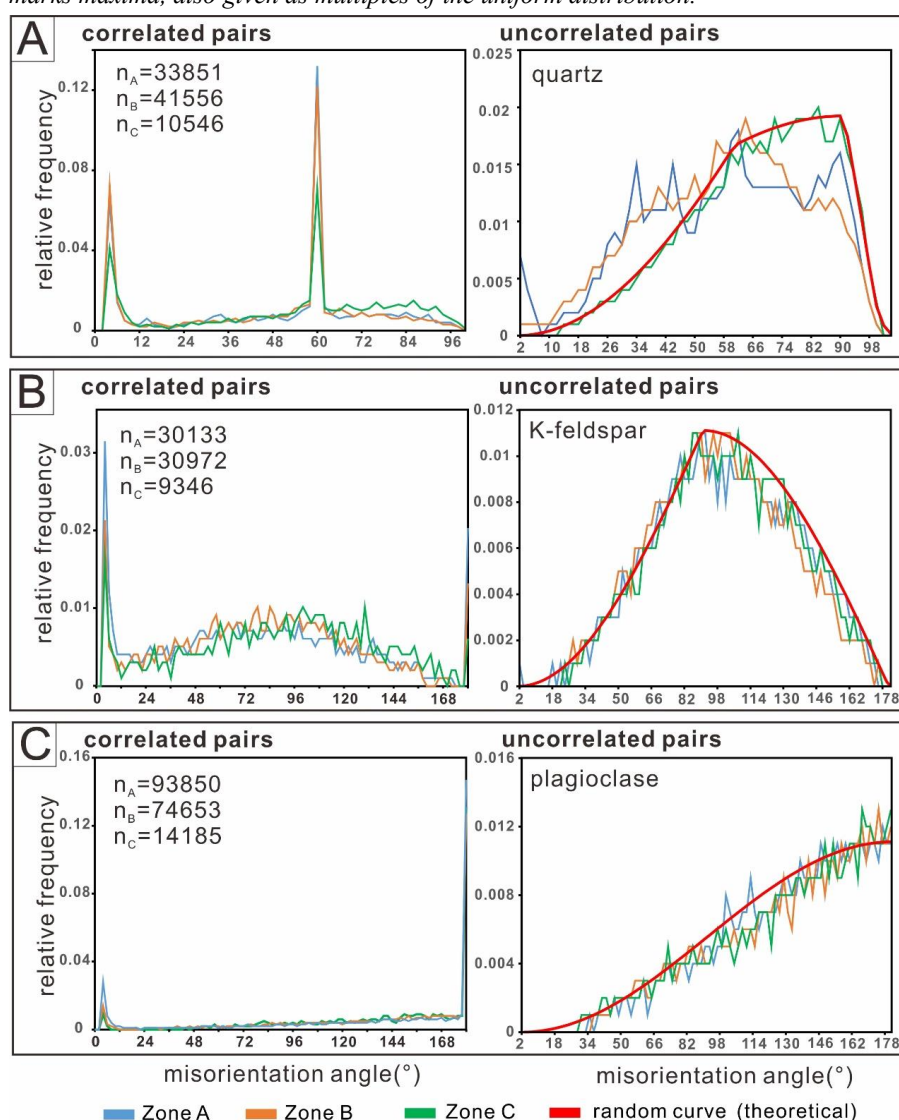

491 Fig. 9. Misorientation angle distribution for correlated and uncorrelated pairs of Fig.6.  
 492 (A) quartz, (B) K-feldspar, and (C) plagioclase in the Zone A, Zone B and Zone C. Solid  
 493 blue lines mark the mineral misorientation angle distribution in Zone A; Solid orange  
 494 lines mark the mineral misorientation angle distribution in Zone B; Solid green lines  
 495





mark the mineral misorientation angle distribution in Zone C. Solid red line marks the  
 calculated random distribution and the number of statistics is 10000 in the random  
 misorientation. In the correlated misorientation,  $n_A$  = the number of statistics in Zone A,  
 $n_B$  = the number of statistics in Zone B,  $n_C$  = the number of statistics in Zone C.

## 6. Thermobarometry of the granodiorite

### 6.1 P-T estimation

Hornblende-plagioclase thermometry is frequently utilized in granites and gneisses  
 with coexisting hornblende and plagioclase to estimate temperature and pressure in  
 magma crystallization or subsequent metamorphism (Schmidt, 1992; Popp et al., 1995;  
 Ridolfi and Renzulli, 2011; Dong et al., 2021). Mineral chemistry was determined on  
 unfoliated granodiorite at the GLG-SZ boundary and on foliated granitic rocks within  
 the GLG-SZ. Experiments were conducted on hornblende grains combined with quartz  
 or plagioclase under the premises for Al-in-hornblende barometry application (Hollister  
 et al., 1987; Schmidt, 1992; Popp et al., 1995; Stein and Dietl, 2001; Ridolfi and Renzulli,  
 2011). In this study, the hornblende-plagioclase geothermometer designed by Holland  
 and Blundy (1994) is employed to determine the temperature. These calculations were  
 based on hornblende solid-solution models and well-constrained natural systems. The  
 temperatures and pressures of the unfoliated granitoids are  $T = 641\text{--}730\text{ }^{\circ}\text{C}$  with an  
 average of  $T = 673\text{ }^{\circ}\text{C}$ ,  $P = 4.0\text{--}5.9\text{ kbar}$  with an average of  $P = 5.1\text{ kbar}$  (Fig. 10A). The  
 crystallization P-T values for the foliated granitic rocks are  $T = 658\text{--}736\text{ }^{\circ}\text{C}$  with an  
 average of  $T = 710\text{ }^{\circ}\text{C}$ ,  $P = 2.1\text{--}2.9\text{ kbar}$  with an average of  $P = 2.7\text{ kbar}$  (Fig. 10B)

### 6.2 Emplacement depth

The crystallization pressures for the investigated granodiorite are calculated by the  
 method developed by Anderson and Smith (1995). It is possible to estimate the pressure  
 with an error of about 0.6 kbar using the method proposed by Popp et al. (1995). This  
 error corresponds to about 2.10 km in depth. The density assumption of  $2.8\text{ g/cm}^3$  is used  
 for the GLG-SZ in our calculations to convert the pressures measured to emplacement  
 depths. After the temperature adjustment, the calculated unfoliated granitoids' pressures  
 range from  $4.0 \pm 0.6\text{ kbar}$  to  $5.8 \pm 0.6\text{ kbar}$ , implying that emplacement depths range  
 from  $14.3 \pm 2.1\text{ km}$  to  $20.7 \pm 2.1\text{ km}$ , and the average depth is 17.5 km (Fig. 10A). The  
 calculated pressures in the foliated granitic samples change from  $2.2 \pm 0.6\text{ kbar}$  to  $2.9 \pm$   
 $0.6\text{ kbar}$ , suggesting that emplacement depths vary from  $7.8 \pm 2.1\text{ km}$  to  $10.3 \pm 2.1\text{ km}$ ,  
 and the average depth is 9.0 km (Fig. 10B).

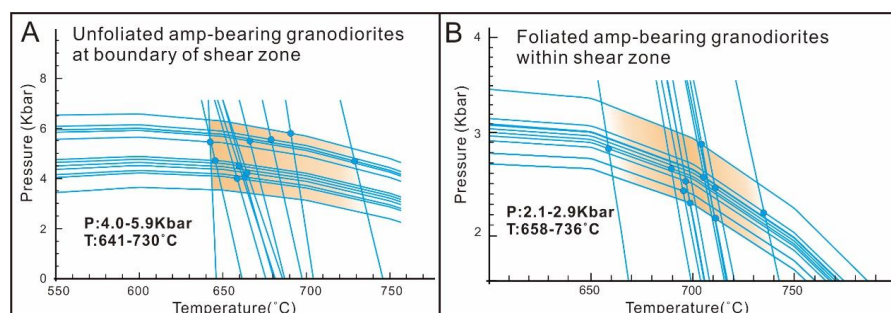

Fig. 10. Pressure-temperature diagram of unfoliated granitoids at boundary of GLG-SZ and foliated granitic rocks within GLG-SZ.

## 7. Paleopiezometry

### 7.1 Flow stress estimate from recrystallized quartz grains

The grain size of dynamically recrystallized quartz varies with differential stress in plastic deformation and is used as a method for calibrating the magnitude of paleostress (Mercier et al., 1977; Twiss, 1977; Twiss, 1980; Koch, 1983; Boutonnet et al., 2013). This study only considered dynamically recrystallized quartz grain sizes from the small-scale shear zones for estimating paleostress. The optical size of recrystallized grains was determined with standard petrographic microscopy. Measurements were performed with each grain perpendicular to macroscopic foliation and parallel to macroscopic lineation (Behrmann and Seckel, 2007). The results of the analysis are listed in Table 1. The standard error of the differential stress estimates is less than 15%.

The differential stress is estimated through piezometer calibration (Stipp and Tullis, 2003), followed by a calibration corrected by Holyoke and Kronenberg (2010). The low-strain domain (Zone A) average size is 165  $\mu\text{m}$ ; the differential flow stress is 12 MPa (Stipp and Tullis, 2003) and 9 MPa (Holyoke and Kronenberg, 2010). The medium-strain domain (Zone B) average size is 78  $\mu\text{m}$ ; the differential flow stress is 21 MPa (Stipp and Tullis, 2003) and 15 MPa (Holyoke and Kronenberg, 2010). The high-strain domain (Zone C) average size is 44  $\mu\text{m}$ ; the differential flow stress is 33 MPa (Stipp and Tullis, 2003) and 24 MPa (Holyoke and Kronenberg, 2010). However, uncertainties remain in the estimation of flow stress from the mineral grain sizes that can be affected by the presence of other phases and notably fluid during deformation.

### 7.2 Flow stress estimate from recrystallized grain size

Estimating the strain rate is a critical step in comprehending deformation processes. The relationships between temperature, microstructures, and CPO patterns corresponding to the dominant slip systems indicate deformation under amphibolite-





facies conditions at temperatures of ca. 400 °C–700 °C in the small-scale shear zones (Hirth and Tullis, 1992; Stipp et al., 2002). In this study, strain rates of quartz grains at temperatures of ca. 550°C were constructed. Ductile creep curves were calculated for strain rates from  $10^{-10}$  to  $10^{-16}$  S<sup>-1</sup> following the flow law from Luan and Peterson (1992) and the wet quartzite flow law of Hirth et al. (2001). In the calculation, the effect of water fugacity was considered, though the dependence of strain rate on water fugacity was not determined in the original paper. When it was applied to the differential stress estimates from dynamically recrystallized grain sizes of quartz by the piezometer (Stipp and Tullis, 2003; Holyoke and Kronenberg, 2010), strain rates estimated in Zone A are  $4.75 \times 10^{-16}$  S<sup>-1</sup> to  $1.17 \times 10^{-14}$  S<sup>-1</sup>, strain rates estimated in Zone B are  $5.13 \times 10^{-15}$  S<sup>-1</sup> to  $1.26 \times 10^{-13}$  S<sup>-1</sup>, and strain rates estimated in Zone C are  $3.16 \times 10^{-14}$  S<sup>-1</sup> to  $7.75 \times 10^{-13}$  S<sup>-1</sup>. The average strain rate estimated in Zone A is  $4.29 \times 10^{-15}$  S<sup>-1</sup>, the average strain rate estimated in Zone B is  $4.62 \times 10^{-14}$  S<sup>-1</sup>, and the average strain rate estimated in Zone C is  $2.85 \times 10^{-13}$  S<sup>-1</sup>.

**Table 1**

Paleopiezometry data for quartz and deduced strain rates in the small-scale shear zone.

| Domain | Recrystall. regime | Apparent grainsize (microns) | Paleopiez-ometer | Stress (MPa) | T (°C) | Flow law | Strain rate (1/s) |
|--------|--------------------|------------------------------|------------------|--------------|--------|----------|-------------------|
| Zone A | GBM                | 165                          | ST-2003          | 12           | 550    | H-2001   | 1.17E-14          |
|        |                    |                              |                  |              |        | LP-1992  | 1.67E-15          |
|        |                    |                              | SH-2010          | 9            | 550    | H-2001   | 3.33E-15          |
| Zone B | GBM+GBS            | 78                           |                  |              |        | LP-1992  | 4.75E-16          |
|        |                    |                              | ST-2003          | 21           | 550    | H-2001   | 1.26E-13          |
|        |                    |                              |                  |              |        | LP-1992  | 1.80E-14          |
| Zone C | GBM+GBS            | 44                           | SH-2010          | 15           | 550    | H-2001   | 3.59E-14          |
|        |                    |                              |                  |              |        | LP-1992  | 5.13E-15          |
|        |                    |                              | ST-2003          | 33           | 550    | H-2001   | 7.75E-13          |
|        |                    |                              |                  |              |        | LP-1992  | 1.11E-13          |
|        |                    |                              | SH-2010          | 24           | 550    | H-2001   | 2.21E-13          |
|        |                    |                              |                  |              |        | LP-1992  | 3.16E-14          |

*Stress estimated using differential piezometer, ST-2003-Stipp and Tullis, 2003 and SH-2010-Koch, 1983. H-2001 flow law is referenced to Hirth et al., 2001, LP-1992 flow law is referenced to Luan and Peterson, 1992.*

## 8. Discussions

### 8.1 Significance of quartz CPOs within the small-scale shear zone

Before this study, the detailed characteristics and conditions of deformation and CPOs of minerals (quartz and feldspar) in the small-scale shear zone were largely



undocumented and discussed, though numerous data on structures, microfabrics, and geochronology have been published from the GLG-SZ show Cenozoic high-temperature ductile deformation conditions (Zhang et al., 2012b; Xu et al., 2015; Dong et al., 2019). The small-scale shear zone developing in the unfoliated granodiorite presents a significant decrease in grain size from the rim (Zone A) to center (Zone C) with increasing strain. In the low-strain domains of Zones A and B, the quartz polycrystalline aggregated ribbons are characterized by grain boundary migration recrystallization (GMR), revealing a medium-high temperature plastic-deformation condition (Fig. 3, 6 and 7; Hippertt et al., 2001; Stipp et al., 2002; Passchier and Trouw, 2005; Holyoke and Tullis, 2006; Hansen et al., 2013; Cavalcante et al., 2018; Dong et al., 2019).

The deformation conditions can be recorded by developed dominated slip systems of deformed quartz grains, which are normally temperature-sensitive (Stipp et al., 2002). Prism  $\langle a \rangle$  slip occurs frequently in high-grade metamorphic rocks (Cao et al., 2011b, 2013a, b), while basal  $\langle a \rangle$  slip appears in low-grade or overprinted metamorphic rocks (Toy et al., 2008; Cao et al., 2010, 2011b; Cheng et al., 2018). The low angle rotation axis distribution and the C-axis patterns of quartz grains from the three zones in the small-scale shear zone display dominated the high-temperature prism  $\langle a \rangle$  slip system (Fig. 6, 7). However, the quartz c-axis patterns in Zones A and B are more intensive, with the Max between 5.33 and 6.42. The misorientation angle distribution of uncorrelated grain pairs does not conform to the random curve (Fig. 7A).

All these results suggest that the quartz grains in the small-scale shear zone have undergone significant high temperature ( $>400\text{--}700^\circ\text{C}$ ) dislocation creep deformation, similar to the GLG-SZ (Dong et al., 2019). However, the quartz c-axes pattern in Zone C demonstrates the weaker intensive of 1.50 (Fig. 8B). The effects of intragranular deformation are dramatically reduced (Fig. 9A). Certain minerals from the high-strain zone C are completely transformed into ultramylonites generated by extremely fine grains. Ultra-plastic flow is an essential process of quartz deformation in the high-strain domain within the shear zone.

## 8.2 Mechanism of feldspar deformation and changed CPO patterns

Studies have demonstrated that feldspars have different deformation behaviors and mechanisms, including brittle fracturing and cataclastic flow in the shallow crustal low-temperature conditions and dynamic recrystallization associated grain-size reduction under the high-temperature conditions (Olsen and Kohlstedt, 1984; Olsen and Kohlstedt, 1985; Tullis and Yund, 1987, 1991; Wintscha and Yi, 2002; Mancktelow and Pennacchioni, 2004; Dang et al., 2017; Menegon et al., 2017; Mansard et al., 2018; Dong et al., 2019). In the studied small-scale shear zone, the feldspar grains present the well-marked variation of compositions and grain sizes from the undeformed magmatic texture to typical crystal plastic flow deformation, revealed by the microstructure, CL, and CPO



properties (Fig. 3). In the low-strain domain of Zone A, undulatory and inhomogeneous extinction are common in the porphyroclastic feldspar grains. Occasionally, the feldspar grains exhibit irregular and sharpened grain boundaries. Most K-feldspar porphyroclasts display elongation and grain-size reduction by dynamic recrystallization. The dynamic recrystallization grains occur in the asymmetric porphyroclast (e.g., hornblende and feldspar) tails with neocrystallization aggregates, which extend to the shear zone's mylonitic foliation/lineation. The K-feldspar porphyroclasts are surrounded by quartz, plagioclase, or K-feldspar fine grains, establishing a typical core-mantle structure (Fig. 4A, B). With an increase in the strain, the feldspar porphyroclasts disintegrate, and the fine feldspar grains gather to layered aggregates with an orientation nearly parallel to the mylonitic foliation (Fig. 4E). Fractures or mechanical twins can be observed in a small amount of large K-feldspar porphyroclasts (Fig. 3D).

Under medium-high temperature deformed conditions, the deformation mechanism of K-feldspar is mainly attributed to activation slip systems of (010)  $\langle 101 \rangle$  or  $\langle 100 \rangle$  (Tullis, 1983; Gandais and Willaime, 1984; Franěk et al., 2006; Ishii et al., 2007; Menegon et al., 2008). Besides, (100)  $\langle 010 \rangle$  slip occurs in K-feldspar zones under upper greenschist facies condition (Ishii et al., 2007). However, plagioclase often reflects main slip systems of (010)  $\langle 001 \rangle$  and (001)  $\langle 110 \rangle$ , while (001)  $\langle 100 \rangle$ , (010)  $\langle 100 \rangle$ , and (111)  $\langle 110 \rangle$  slips develop slip at higher metamorphic conditions (Svava et al., 1985; Kruhl et al., 1987; Ji et al., 1988; Mainprice et al., 1989; Heidelberg et al., 2000; Kruse et al., 2001; Egydio-Silva et al., 2002; Stünitz et al., 2003; Passchier and Trouw, 2005). Under higher-grade metamorphic conditions or intense grain-size reduction and phase mixing, diffusion creep is a more critical deformation mechanism (Gower and Simpson, 1992; Menegon et al., 2008, 2013; Czaplińska et al., 2015; Miranda et al., 2016; Dong et al., 2019). In the low-strain domain (Zone A), the EBSD analysis suggests that the dominant slip system in K-feldspar is (100)  $\langle 010 \rangle$ , and the dominant slip system in plagioclase is (010)  $\langle 001 \rangle$  (Fig. 6B, C). The high proportion of low-angle misorientation angles of plagioclase and K-feldspar demonstrates the development of intragranular deformation (Fig. 9B, C). Thus, the dislocation creep is the dominant mechanism in feldspar deformation within the low-strain domain (Altenberger and Wilhelm, 2000; Menegon et al., 2017). However, the random distribution of feldspar grains cannot be explained by dislocation creep and the formation of myrmekites induced by dynamic recrystallization. These features imply another mechanism during the feldspar deformation in the low-strain domain. They are formed by dissolution-precipitation creep (Menegon et al., 2008; Dong et al., 2019) for the result of grain-boundary diffusion (Ishii et al., 2007).

In the high-strain domain (Zone C), intense grain-size reduction of minerals generated ultramylonites with the increasing strain. Ultra-plastic flow is a crucial process of deformation in the high-strain domain within the shear zone. The fine-grained feldspar



displays (1) a weak CPO (Fig. 8B); (2) equant to slightly elongated shape (Fig. 5, 8A); (3) rare low-angle grain boundaries (Fig. 8C, 9); (4) uncorrelated misorientation angle distributions close to the theoretical random-pair distribution (Fig. 9). This alignment of grains parallel to the displacement direction is frequently reported in materials deforming with a contribution of grain boundary sliding (GBS; e.g., Drury and Humphreys, 1988; Stünitz and J.D., 1993; Fliervoet et al., 1997; Kilian et al., 2011; Mansard et al., 2018). The weakening of CPOs, phase mixing, and grain size reduction suggest that grain boundary sliding (GBS) becomes increasingly active and an essential deformation mechanism (Passchier and Trouw, 2005; Langdon, 2006; Füsseis et al., 2009; Kilian et al., 2011; Platt, 2015; Miranda et al., 2016; Mansard et al., 2018).

### 8.3 Deformation associated fluid of the small-scale shear zone

Recognizing the evolution of small-scale ductile shear zone is also particularly valuable for the understanding of the processes of shear localization in the middle and lower crusts (Mancktelow and Pennacchioni, 2005, 2013; Pennacchioni, 2005; Kilian et al., 2011; Pennacchioni and Mancktelow, 2018), as well as interpreting shear zone history regarding P-T-fluid evolution along strain gradients (Bestmann and Pennacchioni, 2015; Cao and Neubauer, 2016). Hydrolytic weakening has been demonstrated to be a major process facilitating strain localization (Finch et al., 2016; Cao et al., 2017). Fluid can weaken rocks or minerals in several methods (Sibson, 1977; Mancktelow and Pennacchioni, 2004; Kohlstedt, 2006; Kilian et al., 2011; Oliot et al., 2014; Finch et al., 2016; Cao et al., 2017; Cheng et al., 2018). This is in that the fluid in crystals can weaken the mechanical strength of crystals by decreasing the strength of Si-O bonds. It allows easier glide of dislocations (Kohlstedt, 2006) and diffusion at lower temperatures (Sibson, 1977). Intergranular fluid results in nucleation of new grains in cavities by mass transfer, contributing to accelerating grain boundary sliding (GBS) and reducing the intercrystalline rock strength (Chen and Argon, 1979; Kronenberg, 1994; Mancktelow and Pennacchioni, 2004; Kilian et al., 2011). The relevant evidence from low-strain (Zone A) or medium-strain domains (Zone B) reveals that quartz and mica grains of extremely small size (ca. 20µm) occur at the fine-grained plagioclase aggregates or at the junctions of K-feldspar grains (Fig. 11). This kind of feature can be explained by fluid-accommodated grain boundary sliding (GBS). The incomplete displacement along grain boundaries by GBS can trigger the opening of the cavities and leads to the ingress and diffusion of the material (Fliervoet et al., 1997; Passchier and Trouw, 2005; Kilian et al., 2011; Platt, 2015; Finch et al., 2016; Menegon et al., 2017; Precigout et al., 2017; Mansard et al., 2018). The neocrystallization grains pin in cavities restrains grain growth by impeding grain boundary migration and arresting the original grain size at the approximate size of the dynamic recrystallization new grains. The grain size reduction and the increase of phase mixing can further



weaken rock and strain localization in the small-scale shear zones.

Intergranular fluid also reduces the intercrystalline rock strength by metamorphic reaction (White and Knipe, 1978; Hippertt, 1998; Oliot et al., 2014; Spruzeniece and Piazzolo, 2015; Liu, 2017). For example, the retrogressive metamorphism of hornblende and involved water can produce the weaker phase as biotite and quartz (Fig.4C; Liu, 2017). The studied small-scale shear zones reveal the distinct evidence of strain localization accompanied by hydrous retrogression of hornblende to interconnected weaker mica parallel to the main ultramylonitic foliation. That mica presents the visible appearance from undeformed magmatic phases to ductile deformed phases. The biotite occurs as undeformed or slightly bent magmatic phases in the studied unfoliated granodiorite (Fig. 3), generally regarded as the weakest phase (Tullis and Wenk, 1994). As the strain increases, the micas in the low-strain domain break into small pieces, and several mica pieces are parallel to each other which cut across quartz-rich layers. With further localization, a network of monophase biotite layers starts to form in the medium-strain domain of Zone B (Fig. 3G). The interconnected mica layers can be frequently formed during crystal plastic deformation. Additionally, a portion of biotite appears at the quartz and plagioclase grain boundaries (Fig. 4). In the high-strain domain, the network of micas is destroyed, and the mica grains are disseminated in the matrix (Fig. 4C, 11C). This presents similar distributed features to diffusion creep (Fliervoet et al., 1997; Herwegh and Jenni, 2001). The microstructure characteristics imply that the formation of biotite can soften the rock's matrix, resulting in increased deformation intensity (Mancktelow, 2008; Fossen and Cavalcante, 2017; Mansard et al., 2018).

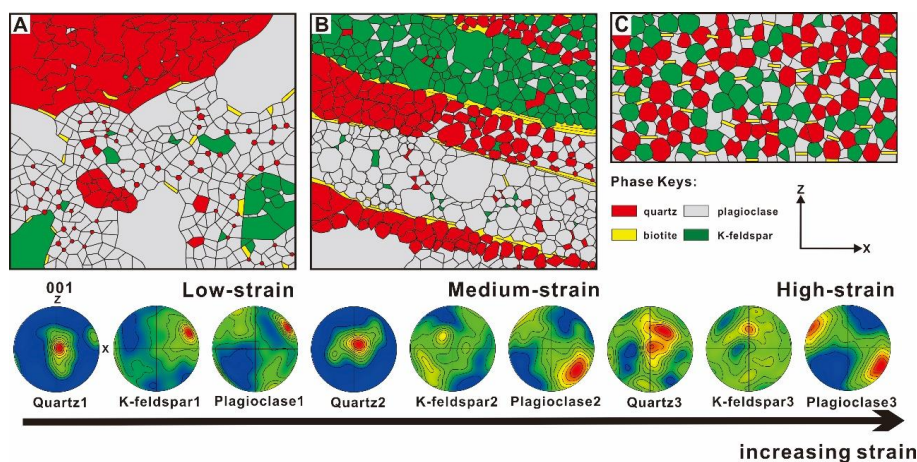

Fig. 11. Representative maps of the different strain domain that have been manually digitized and the variety of mineral c-axis orientation in the small-scale shear zone (A) Low-strain domain which is closed with wall-rock. (B) Medium-strain domain which is strip in shape. (C) High-strain domain which is mixed-phase zone.





725

#### 726 **8.4 Formation conditions and processes of the small-scale shear zone**

727 Microstructural analyses of the small-scale shear zones reveal ductile deformation  
 728 processes in the deep-seated crust. The unfoliated granitoids have an average  
 729 emplacement depth of 18 km. Macro- and micro-structures apparently reveal progressive  
 730 plastic deformation behaviors of the major mineral phases (quartz, feldspar, hornblende,  
 731 and mica) in response to a progressive ductile deformation history of the small-scale  
 732 shear zone (Fig. 11). The results demonstrate that the small-scale shear zone has  
 733 experienced high-temperature deformation conditions at least amphibolite facies during  
 734 the dominant ductile shearing. The small-scale shear zones and the foliated granodiorite  
 735 within the GLG-SZ exhibit identical synkinematic metamorphic assemblages and  
 736 microstructures (Fig.3; Dong et al., 2019, 2021). In other words, they formed under  
 737 similar metamorphic and deformation conditions. The temperature conditions of foliated  
 738 granodiorite are determined based on hornblende-plagioclase thermometry to be 670–  
 739 735 °C (Fig. 10B). Similar temperature conditions are inferred in the small-scale shear  
 740 zones. The development of myrmekite and the recrystallization of quartz also can verify  
 741 the high-temperature metamorphic conditions in the small-scale shear zones (Figs.3&4;  
 742 Wirth and Voll, 1987; Tribe and D’Lemos, 1996; Ceccato et al., 2018). The initiation of  
 743 prism  $\langle a \rangle$  slip and the features of grain boundary migration recrystallization of quartz  
 744 grains confirm that the small-scale shear zones formed at the medium-high temperature  
 745 condition (Fig.6; Hobbs, 1985; Mainprice et al., 1986; Stipp and Tullis, 2003; Passchier  
 746 and Trouw, 2005; Toy et al., 2008; Gibert and Mainprice, 2009; Xia and Liu, 2011).

747 Generally, rheological weakening mechanisms play a significant role in the  
 748 localization of shear zones, as shear zones typically form in the weakest zone (Schmid  
 749 et al., 1996; Imber et al., 1997; Rosenberg, 2004; Dayem et al., 2009; Yamasaki et al.,  
 750 2014; Cao and Neubauer, 2016; Fossen and Cavalcante, 2017; Liu, 2017; Pennacchioni  
 751 and Mancktelow, 2018). Besides temperature and pressure, several other factors such as  
 752 mineralogy, strain rate, microstructure, texture, and fluid that can weaken mechanisms  
 753 are activated during strain localization (Mancktelow and Pennacchioni, 2004; Oliot et  
 754 al., 2014; Cao and Neubauer, 2016; Finch et al., 2016; Fossen and Cavalcante, 2017; Liu,  
 755 2017; Pennacchioni and Mancktelow, 2018). Localization may be caused by an external  
 756 inhomogeneity such as a precursor fracture or joint, according to the macroscopic shear  
 757 zone distribution and orientation similar to joint orientations in the same rock (Menegon  
 758 and Pennacchioni, 2009). In this study, microstructural observations imply that the  
 759 switch of deformation characteristics from wall rocks to the high-strain domain cannot  
 760 be explained by the “precursor effect” (Fig. 3D). This inference cannot be confirmed by  
 761 the varying orientation of small-scale shear zones (Fig. 1C). The high-temperature  
 762 deformation conditions suggest that the initiation of the small-scale shear zones is at



depth, where temperature-controlled rheological weakening mechanisms play an essential role in localizing future shear zones. Thermal heterogeneities of the lithosphere can lead to shear concentration along hot-to-cold contacts ascribed to thermally enhanced rheological weakening. Hence, rheological weakening by heterogeneities may induce strain localization and increase strain rates within magmatic rocks bearing shear zones (Cao and Neubauer, 2016; Fossen and Cavalcante, 2017; Liu, 2017). The fast strain rate within the high-strain domain of the small-scale shear zone is the consistent geological evidence (Table 1). Thus, the deformation in the small-scale shear zones would be localized to a narrow site through thermal-enhanced rheological weakening mechanisms when GLG-SZ is deformed.

Interestingly, the strain rates gradually decrease from the high-strain ( $2.85 \times 10^{-13} \text{ S}^{-1}$ ) to the low-strain domain ( $4.29 \times 10^{-15} \text{ S}^{-1}$ ) in the small-scale shear zone. It can be explained by the model of shear zone widening during shear deformation (Oliot et al., 2014) after the influence of temperature is eliminated. The center of a shear zone generally presents extreme grain-size reduction, involving fluid-assisted granular flow deformation. The GBS can facilitate fluid migration through shear zones by causing cavities to open and closure, which in turn induces fluids to be pumped through the rock (Fliervoet et al., 1997; Passchier and Trouw, 2005; Kilian et al., 2011; Finch et al., 2016; Menegon et al., 2017; Mansard et al., 2018). This created a pressure gradient, which expelled fluids, leading to hydraulic microfracturing, metasomatism, host rock weakening, and shear zone widening (Oliot et al., 2010, 2014; Finch et al., 2016). In the small-scale shear zone, the localized deformation provoked the release of intracrystalline water to grain boundaries and the migration of water to less deformed rocks, widening the shear zones. Fluid content could restrict weak rheology in the widened shear zone and decrease strain rates. This is also the reason for the grain size stratification of small-scale shear zones (Fig. 11). Field observations and microstructural observations reveal that the kinematic directions of the small-scale shear zone and the continental-scale GLG-SZ are consistent (Fig. 3), reflecting that small-scale shear zones are controlled by the GLG-SZ during progressive deformation and exhumation. The geothermal data demonstrate that the foliated granitic rocks have occurred at least 9 km of vertical displacement in GLG-SZ. The intrusion depth to the shearing depth may be related to the GLG-SZ tectonic shearing and exhumation (Fig. 10). It also produces a lower temperature condition in granitoids where brittle deformation can occur. Thus, the small-scale shear zone activates as a fault and makes the mafic enclaves cut in the outcrop-scale (Fig. 2G).

## 10. Conclusions

The analyses of meso- and micro-structural, EBSD texture, paleopiezometry, and thermobarometry lead to the following conclusions:



(1) The small-scale shear zones at the boundary of GLG-SZ have experienced vibrations deformation, mineral composition, and fabric transition from the rim zone of protomylonite to the center zone of ultramylonites, accompanied by a significant grain-size reduction and progressive phase mixing of minerals with an increase in the strain.

(2) The progressive development of microstructures suggests that the ductile deformation of small-scale shear zone is at least amphibolite facies conditions. Rheological weakening due to thermal heterogeneities induces strain localization, resulting in the initiation of the small-scale shear zone.

(3) The deformation mechanism of the coarse-grained aggregate zone in the shear zone is dominated by dislocation creep, while the polyphase fine-grained mixed zone possesses the dominant mechanism of viscous grain boundary sliding. Fluid-assisted deformation plays a crucial role in the hydrous retrogression and subsequent flow rheological weakening of the shear-zone.

(4) The deformation of the small-scale shear zone within the unfoliated granodiorite is controlled by the continental GLG-SZ. The small-scale shear zones experience the same kinematic direction of ductile shearing at depth and during exhumation, as well as the GLG-SZ.

**Author contributions:** Shuyun Cao and Lefan Zhan planned the overarching research goals and aims; Yanlong Dong, Wenyan Li and Lefan Zhan performed the measurements and took the samples; Lefan Zhan analyzed the data; Lefan Zhan wrote the manuscript draft; Shuyun Cao, Yanlong Dong, Wenyan Li and Lefan Zhan reviewed and edited the manuscript.

**Acknowledgments:** We gratefully acknowledge Prof. Pennacchioni G. for a lot of discussions and together for field trip. This work was financially supported by National Natural Science Foundations of China (Grant no. 41972220; 4188810) and National Key Research and Development Program (Grant no. 2017YFC0602401) and the Excellent Youth Fund of National Natural Science Foundation of China (Grant no. 41722207).

## REFERENCES

- Abers, G.A., van Keken, P.E., Wilson, C.R.: Deep decoupling in subduction zones: Observations and temperature limits, *Geosphere*, 16, 1408-1424, 2020.
- Altenberger, U., Wilhelm, S.: Ductile deformation of K-feldspar in dry eclogite facies shear zones in the Bergen Arcs, Norway, *Tectonophysics*, 320, 107-121, 2000.
- Behrmann, J.H., Seckel, C.: Structures, flow stresses, and estimated strain rates in metamorphic rocks of the Small Cyclades Islands Iraklia and Schinoussa (Aegean Sea, Greece), *Geotectonic Research*, 95, 1-11, 2007.



- 839 Bense, V.F., Gleeson, T., Loveless, S.E., Bour, O., Scibek, J.: Fault zone hydrogeology,  
 840 Earth-Sci. Rev., 127, 171-192, 2013.
- 841 Bestmann, M., Pennacchioni, G.: Ti distribution in quartz across a heterogeneous shear  
 842 zone within a granodiorite: The effect of deformation mechanism and strain on Ti  
 843 resetting, Lithos, 227, 37-56, 2015.
- 844 Bhattacharya, A.R., Weber, K.: Fabric development during shear deformation in the  
 845 Main Central Thrust Zone, NW-Himalaya, India, Tectonophysics, 387, 23-46, 2004.
- 846 Bistacchi, A., Massironi, M., Menegon, L.: Three-dimensional characterization of a  
 847 crustal-scale fault zone: The Pusteria and Sprechenstein fault system (Eastern Alps),  
 848 J. Struct. Geol., 32, 2022-2041, 2010.
- 849 Blundy, J.D., Holland, T.J.B.: Calcic amphibole equilibria and a new amphibole-  
 850 plagioclase geothermometer, Contrib. Mineral. Petrol., 104, 208-224, 1990.
- 851 Bons, P.D., Jessell, M.W.: Micro-shear zones in experimentally deformed  
 852 octachloropropane, J. Struct. Geol., 21, 323-334, 1999.
- 853 Brown, M., Solar, G.S.: Shear-zone systems and melts: feedback relations and self-  
 854 organization in orogenic belts, J. Struct. Geol., 20, 211-227, 1998.
- 855 Cao, S., Liu, J., Leiss, B.: Orientation-related deformation mechanisms of naturally  
 856 deformed amphibole in amphibolite mylonites from the Diancang Shan, SW Yunnan,  
 857 China, J. Struct. Geol., 32, 606-622, 2010.
- 858 Cao, S., Liu, J., Leiss, B., Neubauer, F., Genser, J., Zhao, C.: Oligo-Miocene shearing  
 859 along the Ailao Shan–Red River shear zone: Constraints from structural analysis and  
 860 zircon U/Pb geochronology of magmatic rocks in the Diancang Shan massif, SE  
 861 Tibet, China, Gondwana Res., 19, 975-993, 2011.
- 862 Cao, S., Neubauer, F.: Deep crustal expressions of exhumed strike-slip fault systems:  
 863 Shear zone initiation on rheological boundaries, Earth-Sci. Rev., 162, 155-176, 2016.
- 864 Cao, S., Neubauer, F., Bernroider, M., Liu, J.: The lateral boundary of a metamorphic  
 865 core complex: The Moutsounas shear zone on Naxos, Cyclades, Greece, J. Struct.  
 866 Geol., 54, 103-128, 2013a.
- 867 Cao, S., Neubauer, F., Bernroider, M., Liu, J., Genser, J.: Structures, microfabrics and  
 868 textures of the Cordilleran-type Rechnitz metamorphic core complex, Eastern Alps,  
 869 Tectonophysics, 608, 1201-1225, 2013b.
- 870 Cao, S., Neubauer, F., Liu, J., Bernroider, M., Cheng, X., Li, J., Yu, Z., Genser, J.:  
 871 Rheological weakening of high-grade mylonites during low-temperature  
 872 retrogression: The exhumed continental Ailao Shan-Red River fault zone, SE Asia,  
 873 J. Asian Earth Sci., 139, 40-60, 2017.
- 874 Cavalcante, C., Lagoeiro, L., Fossen, H., Egydio-Silva, M., Morales, L.F.G., Ferreira, F.,  
 875 Conte, T.: Temperature constraints on microfabric patterns in quartzofeldspathic  
 876 mylonites, Ribeira belt (SE Brazil), J. Struct. Geol., 115, 243-262, 2018.





- 877 Ceccato, A., Menegon, L., Pennacchioni, G., Morales, L.F.G.: Myrmekite and strain  
 878 weakening in granitoid mylonites, *Solid Earth*, 9, 1399-1419, 2018.
- 879 Ceccato, A., Goncalves, P., Pennacchioni, G.: Temperature, fluid content and rheology  
 880 of localized ductile shear zones in subsolidus cooling plutons, *J. Metamorph. Geol.*,  
 881 38, 881-903, 2020.
- 882 Chen, I.W., Argon, A.S.: Grain boundary and interphase boundary sliding in power law  
 883 creep, *Acta Metallurgica*, 27, 749-754, 1979.
- 884 Chen, K., Scales, M., Kyriakides, S.: Ductile Failure Under Combined Tension and Shear,  
 885 *Journal of Physics: Conference Series*, 1063, 2018.
- 886 Cheng, X., Cao, S., Li, J., Yu, Z., Dong, Y., Lv, M., Liu, J.: Metamorphic, deformation,  
 887 fluids and geological significance of low-temperature retrograde mylonites of  
 888 Diancangshan metamorphic massif along Ailaoshan-Red River strike-slip fault zone,  
 889 Yunnan, China, *Sci. China-Earth Sci.*, 61, 1023-1041, 2018.
- 890 Chiu, Y.P., Yeh, M.W., Wu, K.H., Lee, T.Y., Lo, C.H., Chung, S.L., Iizuka, Y.: Transition  
 891 from extrusion to flow tectonism around the Eastern Himalaya syntaxis, *Geol. Soc.*  
 892 *Am. Bull.*, 130, 1675-1696, 2018.
- 893 Collettini, C., Niemeijer, A., Viti, C., Marone, C.: Fault zone fabric and fault weakness,  
 894 *Nature*, 462, 907-910, 2009.
- 895 Cunningham, W.D., Mann, P.: Tectonics of strike-slip restraining and releasing bends,  
 896 *Geological Society, London, Special Publications*, 290, 1-12, 2007.
- 897 Czaplińska, D., Piazzolo, S., Zibra, I.: The influence of phase and grain size distribution  
 898 on the dynamics of strain localization in polymineralic rocks, *J. Struct. Geol.*, 72, 15-  
 899 32, 2015.
- 900 Dang, J., Zhou, Y., Rybacki, E., He, C., Dresen, G.: An experimental study on the brittle–  
 901 plastic transition during deformation of granite, *J. Asian Earth Sci.*, 139, 30-39, 2017.
- 902 Dayem, K.E., Houseman, G.A., Molnar, P.: Localization of shear along a lithospheric  
 903 strength discontinuity: Application of a continuous deformation model to the  
 904 boundary between Tibet and the Tarim Basin, *Tectonics*, 28, n/a-n/a, 2009.
- 905 Dong, Y., Cao, S., Cheng, X., Liu, J., Cao, H.: Grain-size reduction of feldspar and flow  
 906 of deformed granites within the Gaoligong shear zone, southwestern Yunnan, China,  
 907 *Sci. China-Earth Sci.*, 62, 1379-1398, 2019.
- 908 Dong, Y., Cao, S., Neubauer, F., Wang, H., Li, W., Genser, J.: Exhumation of the crustal-  
 909 scale Gaoligong strike-slip shear belt in Southeast Asia, *J. Geol. Soc.*, 2021.
- 910 Drury, M.R., Humphreys, F.J.: Microstructural shear criteria associated with grain-  
 911 boundary sliding during ductile deformation, *J. Struct. Geol.*, 10, 83-89, 1988.
- 912 Egydio-Silva, M., Vauchez, A., Bascou, J., Hippertt, J.: High-temperature deformation  
 913 in the Neoproterozoic transpressional Ribeira belt, southeast Brazil, *Tectonophysics*,  
 914 352, 203-224, 2002.



- 915 Evans, D.M.: Kabanga magmatic nickel sulphide deposits, Tanzania: morphology and  
 916 geochemistry of associated intrusions, *J. Afr. Earth Sci.*, 30, 651-674, 2000.
- 917 Fagereng, A., Beall, A.: Is complex fault zone behaviour a reflection of rheological  
 918 heterogeneity, *Philos Trans A Math Phys Eng Sci* 379, 20190421, 2021.
- 919 Faulkner, D.R., Rutter, E.H.: Can the maintenance of overpressured fluids in large strike-  
 920 slip fault zones explain their apparent weakness, *Geology*, 29, 2001.
- 921 Finch, M.A., Weinberg, R.F., Hunter, N.J.R.: Water loss and the origin of thick  
 922 ultramylonites, *Geology*, 44, 599-602, 2016.
- 923 Fliervoet, T.F., White, S.H., Drury, M.R.: Evidence for dominant grain-boundary sliding  
 924 deformation in greenschist- and amphibolite-grade polymineralic ultramylonites  
 925 from the Redbank Deformed Zone, Central Australia, *J. Struct. Geol.*, 19, 1495-1520,  
 926 1997.
- 927 Fossen, H., Cavalcante, G.C.G.: Shear zones—A review, *Earth-Sci. Rev.*, 171, 434-455,  
 928 2017.
- 929 Franěk, J., Schulmann, K., Lexa, O.: Kinematic and rheological model of exhumation of  
 930 high pressure granulites in the Variscan orogenic root: example of the Blanský les  
 931 granulite, Bohemian Massif, Czech Republic, *Mineral. Petrol.*, 86, 253-276, 2006.
- 932 Frost, E., Dolan, J., Ratschbacher, L., Hacker, B., Seward, G.: Direct observation of fault  
 933 zone structure at the brittle-ductile transition along the Salzach-Ennstal-Mariazell-  
 934 Puchberg fault system, Austrian Alps, *J. Geophys. Res.*, 116, 2011.
- 935 Fusseis, F., Regenauer-Lieb, K., Liu, J., Hough, R.M., De Carlo, F.: Creep cavitation can  
 936 establish a dynamic granular fluid pump in ductile shear zones, *Nature*, 459, 974-  
 937 977, 2009.
- 938 Ganade de Araujo, C.E., Weinberg, R.F., Cordani, U.G.: Extruding the Borborema  
 939 Province (NE-Brazil): a two-stage Neoproterozoic collision process, *Terr. Nova*, 26,  
 940 157-168, 2014.
- 941 Gandais, M., Willaime, C.: *Mechanical Properties of Feldspars, Feldspars and*  
 942 *Feldspathoids: Structures, Properties and Occurrences*, 1st ed. Springer, Netherland,  
 943 pp. 207-246, 1984.
- 944 Gibert, B., Mainprice, D.: Effect of crystal preferred orientations on the thermal  
 945 diffusivity of quartz polycrystalline aggregates at high temperature, *Tectonophysics*,  
 946 465, 150-163, 2009.
- 947 Gower, R.J.W., Simpson, C.: Phase boundary mobility in naturally deformed, high-grade  
 948 quartzofeldspathic rocks: evidence for diffusional creep, *J. Struct. Geol.*, 14, 301-  
 949 313, 1992.
- 950 Handy, M.R.: Deformation regimes and the rheological evolution of fault zones in the  
 951 lithosphere: the effects of pressure, temperature, grain size and time, *Tectonophysics*,  
 952 163, 119-152, 1989.



- 953 Hanmer, S.: Great Slave Lake Shear Zone, Canadian Shield: reconstructed vertical  
 954 profile of a crustal-scale fault zone, *Tectonophysics*, 149, 245-264, 1988.
- 955 Hansen, L.N., Cheadle, M.J., John, B.E., Swapp, S.M., Dick, H.J.B., Tucholke, B.E.,  
 956 Tivey, M.A.: Mylonitic deformation at the Kane oceanic core complex: Implications  
 957 for the rheological behavior of oceanic detachment faults, *Geochem. Geophys.*  
 958 *Geosyst.*, 14, 3085-3108, 2013.
- 959 Heidelbach, F., Post, A., Tullis, J.: Crystallographic preferred orientation in albite  
 960 samples deformed experimentally by dislocation and solution precipitation creep, *J.*  
 961 *Struct. Geol.*, 22, 1649-1661, 2000.
- 962 Hippertt, J., Rocha, A., Lana, C., Egydio-Silva, M., Takeshita, T.: Quartz plastic  
 963 segregation and ribbon development in high-grade striped gneisses, *J. Struct. Geol.*,  
 964 23, 67-80, 2001.
- 965 Hippertt, J.F.: Breakdown of feldspar, volume gain and lateral mass transfer during  
 966 mylonitization of granitoid in a low metamorphic grade shear zone, *J. Struct. Geol.*,  
 967 20, 175-193, 1998.
- 968 Hirth, G., Teyssier, C., Dunlap, J.W.: An evaluation of quartzite flow laws based on  
 969 comparisons between experimentally and naturally deformed rocks, *Int. J. Earth Sci.*,  
 970 90, 77-87, 2001.
- 971 Hirth, G., Tullis, J.: Dislocation creep regimes in quartz aggregates, *J. Struct. Geol.*, 14,  
 972 145-159, 1992.
- 973 Hobbs, B.: The Geological Significance of Microfabric Analysis, Preferred Orientation  
 974 in Deformed Metals and Rocks: An Introducton to Modern Texture Analysis, pp.  
 975 463-484, 1985.
- 976 Holland, T., Blundy, J.: Non-ideal interactions in calcic amphiboles and their bearing on  
 977 amphibole-plagioclase thermometry, *Contrib. Mineral. Petrol.*, 116, 433-447, 1994.
- 978 Hollister, L.S., Grissom, G.C., Peters, E.K., Stowell, H.H., Gisson, V.B.: Confirmation  
 979 of the empirical correlation of Al in hornblende with pressure of solidification of  
 980 calc-alkaline plutons, *Am. Miner.*, 72, 231-239, 1987.
- 981 Holyoke, C.W., Tullis, J.: Formation and maintenance of shear zones, *Geology*, 34, 2006.
- 982 Imber, I., Holdsworth, R.E., Butler, C.A., Lloyd, G.E.: Fault-zone weakening processes  
 983 along the reactivated Outer Hebrides Fault Zone, Scotland, *J. Geol. Soc.*, 154, 105-  
 984 109, 1997.
- 985 Ishii, K., Kanagawa, K., Shigematsu, N., Okudaira, T.: High ductility of K-feldspar and  
 986 development of granitic banded ultramylonite in the Ryoke metamorphic belt, SW  
 987 Japan, *J. Struct. Geol.*, 29, 1083-1098, 2007.
- 988 Luan, F.C., Paterson, M.S.: Preparation and deformation of synthetic aggregates of  
 989 quartz, *J. Geophys. Res* 97, 301-320, 1992.
- 990 Ji, J., Zhong, D., Sang, H., Zhang, L.: The western boundary of extrusion blocks in the



- 991       southeastern Tibetan Plateau, *Chin. Sci. Bull.*, 876-881, 2000a.
- 992   Ji, J., Zhong, D., Shang, H., Qiu, J., Hu, S.: Dating of two metamorphic events on the  
 993       basalt granulite from Nabang area on the border of China and Burma, *Acta Petrol.*  
 994       *Sin.*, 16, 227-232, 2000b.
- 995   Kilian, R., Heilbronner, R., Stünitz, H.: Quartz grain size reduction in a granitoid rock  
 996       and the transition from dislocation to diffusion creep, *J. Struct. Geol.*, 33, 1265-1284,  
 997       2011.
- 998   Kohlstedt, D.: The Role of Water in High-Temperature Rock Deformation, *Reviews in*  
 999       *Mineralogy & Geochemistry*, Mineralogical Society of America, Washington, D.C.,  
 1000       pp. 377-396, 2006.
- 1001   Kronenberg, A.K.: Hydrogen speciation and chemical weakening of quartz, *Reviews in*  
 1002       *Mineralogy*, 29, 123-176, 1994.
- 1003   Kruhl, J.H.: Preferred lattice orientations of plagioclase from amphibolite and  
 1004       greenschist facies rocks near the Insubric Line (Western Alps), *Tectonophysics*, 135,  
 1005       233-242, 1987.
- 1006   Kruse, R., Stünitz, H., Kunze, K.: Dynamic recrystallization processes in plagioclase  
 1007       porphyroclasts, *J. Struct. Geol.*, 23, 1781-1802, 2001.
- 1008   Langdon, T.G.: Grain boundary sliding revisited: Developments in sliding over four  
 1009       decades, *J. Mater. Sci.*, 41, 597-609, 2006.
- 1010   Liu, J.L.: Strain localization and strain weakening in the continental middle crust, *Acta*  
 1011       *Petrol. Sin.*, 33, 1653-1666, 2017.
- 1012   Liu, Z., Ji, J., Sa, X., Chen, Y., Zhong, D.: Crustal deformation and tectonic levels of  
 1013       Nuijiang Gorge since the Miocene, *Sci. China-Earth Sci.*, 61, 93-108, 2017.
- 1014   Mainprice, D., Bouchez, J.-L., Blumenfeld, P., Tubiã, J.M.: Dominant c slip in naturally  
 1015       deformed quartz: Implications for dramatic plastic softening at high temperature,  
 1016       *Geology*, 14, 819-822, 1986.
- 1017   Mancktelow, N.S.: Finite-element modelling of shear zone development in viscoelastic  
 1018       materials and its implications for localisation of partial melting, *J. Struct. Geol.*, 24,  
 1019       1045-1053, 2002.
- 1020   Mancktelow, N.S.: Tectonic pressure: Theoretical concepts and modelled examples,  
 1021       *Lithos*, 103, 149-177, 2008.
- 1022   Mancktelow, N.S., Pennacchioni, G.: The influence of grain boundary fluids on the  
 1023       microstructure of quartz-feldspar mylonites, *J. Struct. Geol.*, 26, 47-69, 2004.
- 1024   Mancktelow, N.S., Pennacchioni, G.: The control of precursor brittle fracture and fluid–  
 1025       rock interaction on the development of single and paired ductile shear zones, *J. Struct.*  
 1026       *Geol.*, 27, 645-661, 2005.
- 1027   Mancktelow, N.S., Pennacchioni, G.: Late magmatic healed fractures in granitoids and  
 1028       their influence on subsequent solid-state deformation, *J. Struct. Geol.*, 57, 81-96,





- 1029 2013.
- 1030 Mancktelow, N.S., Pennacchioni, G.: Intermittent fracturing in the middle continental  
1031 crust as evidence for transient switching of principal stress axes associated with the  
1032 subduction zone earthquake cycle, *Geology*, 48, 1072-1076, 2020.
- 1033 Mansard, N., Raimbourg, H., Augier, R., Précigout, J., Le Breton, N.: Large-scale strain  
1034 localization induced by phase nucleation in mid-crustal granitoids of the south  
1035 Armorican massif, *Tectonophysics*, 745, 46-65, 2018.
- 1036 Martelat, J.-E., Schulmann, K., Lardeaux, J.-M., Nicollet, C., Cardon, H.: Granulite  
1037 microfabrics and deformation mechanisms in southern Madagascar, *J. Struct. Geol.*,  
1038 21, 671-687, 1999.
- 1039 Menegon, L., Pennacchioni, G.: Local shear zone pattern and bulk deformation in the  
1040 Gran Paradiso metagranite (NW Italian Alps), *Int. J. Earth Sci.*, 99, 1805-1825, 2009.
- 1041 Menegon, L., Pennacchioni, G., Malaspina, N., Harris, K., Wood, E.: Earthquakes as  
1042 Precursors of Ductile Shear Zones in the Dry and Strong Lower Crust, *Geochem.*  
1043 *Geophys. Geosyst.*, 18, 4356-4374, 2017.
- 1044 Menegon, L., Pennacchioni, G., Spiess, R.: Dissolution-precipitation creep of K-feldspar  
1045 in mid-crustal granite mylonites, *J. Struct. Geol.*, 30, 565-579, 2008.
- 1046 Miranda, E.A., Hirth, G., John, B.E.: Microstructural evidence for the transition from  
1047 dislocation creep to dislocation-accommodated grain boundary sliding in naturally  
1048 deformed plagioclase, *J. Struct. Geol.*, 92, 30-45, 2016.
- 1049 Misra, S., Mandal, N.: Localization of plastic zones in rocks around rigid inclusions:  
1050 Insights from experimental and theoretical models, *J. Geophys. Res.*, 112, 2007.
- 1051 Montardi, Y., Mainprice, D.: A transmission electron microscopic study of the natural  
1052 plastic deformation of calcic plagioclases (AN-68-70), *Bulletin De Mineralogie*,  
1053 110, 1-14, 1987.
- 1054 Morley, C.K.: Variations in Late Cenozoic–Recent strike-slip and oblique-extensional  
1055 geometries, within Indochina: The influence of pre-existing fabrics, *J. Struct. Geol.*,  
1056 29, 36-58, 2007.
- 1057 Morrow, C., Solum, J., Tembe, S., Lockner, D., Wong, T.F.: Using drill cutting separates  
1058 to estimate the strength of narrow shear zones at SAFOD, *Geophys. Res. Lett.*, 34,  
1059 2007.
- 1060 Nevitt, J.M., Pollard, D.D.: Impacts of off-fault plasticity on fault slip and interaction at  
1061 the base of the seismogenic zone, *Geophys. Res. Lett.*, 2017.
- 1062 Nevitt, J.M., Warren, J.M., Pollard, D.D.: Testing constitutive equations for brittle-  
1063 ductile deformation associated with faulting in granitic rock, *J. Geophys. Res.*, *Solid*  
1064 *Earth* 122, 6269-6293, 2017.
- 1065 Oliot, E., Goncalves, P., Marquer, D.: Role of plagioclase and reaction softening in a  
1066 metagranite shear zone at mid-crustal conditions (Gotthard Massif, Swiss Central



- Alps), *J. Metamorph. Geol.*, 28, 849-871, 2010.
- Oliot, E., Goncalves, P., Schulmann, K., Marquer, D., Lexa, O.: Mid-crustal shear zone formation in granitic rocks: Constraints from quantitative textural and crystallographic preferred orientations analyses, *Tectonophysics*, 612-613, 63-80, 2014.
- Olsen, T.S., Kohlstedt, D.L.: Analysis of Dislocations in Some Naturally Deformed Plagioclase Feldspars, *Phys. Chem. Miner.*, 11, 153-160, 1984.
- Olsen, T.S., Kohlstedt, D.L.: Natural deformation and recrystallization of some intermediate plagioclase feldspars, *Tectonophysics*, 111, 107-131, 1985.
- Oriolo, S., Wemmer, K., Oyhançabal, P., Fossen, H., Schulz, B., Siegesmund, S.: Geochronology of shear zones – A review, *Earth-Sci. Rev.*, 185, 665-683, 2018.
- Otani, M., Wallis, S.: Quartz lattice preferred orientation patterns and static recrystallization: Natural examples from the Ryoke belt, Japan, *Geology*, 34, 2006.
- Passchier, C.W., Trouw, R.A.J.: *Microtectonics*, 2nd ed, Springer, Berlin, 2005.
- Pennacchioni, G.: Control of the geometry of precursor brittle structures on the type of ductile shear zone in the Adamello tonalites, Southern Alps (Italy), *J. Struct. Geol.*, 27, 627-644, 2005.
- Pennacchioni, G., Mancktelow, N.S.: Small-scale ductile shear zones: Neither extending, nor thickening, nor narrowing, *Earth-Sci. Rev.*, 184, 1-12, 2018.
- Pennacchioni, G., Zucchi, E.: High temperature fracturing and ductile deformation during cooling of a pluton: The Lake Edison granodiorite (Sierra Nevada batholith, California), *J. Struct. Geol.*, 50, 54-81, 2013.
- Platt, J.P.: Rheology of two-phase systems: A microphysical and observational approach, *J. Struct. Geol.*, 77, 213-227, 2015.
- Popp, R.K., Virgo, D., Yoder, H.S., Hoering, T.C., Phillips, M.W.: An experimental study of phase equilibria and Fe oxy-component in kaersutitic amphibole: Implications for the  $f_{H_2}$  and  $a_{H_2O}$  in the upper mantle, *Am. Miner.*, 80, 534-548, 1995.
- Precigout, J., Prigent, C., Palasse, L., Pochon, A.: Water pumping in mantle shear zones, *Nat. Commun.*, 8, 15736, 2017.
- Précigout, J., Stünitz, H.: Evidence of phase nucleation during olivine diffusion creep: A new perspective for mantle strain localisation, *Earth Planet. Sci. Lett.*, 455, 94-105, 2016.
- Ratschbacher, L., Merle, O., Davy, P. and Cobbold, P.: Lateral extrusion in the Eastern Alps, Part 1: Boundary conditions and experiments scaled for gravity, *Tectonics*, 10, 245-256, 1991.
- Ridolfi, F., Renzulli, A.: Calcic amphiboles in calc-alkaline and alkaline magmas: thermobarometric and chemometric empirical equations valid up to 1,130°C and 2.2 GPa, *Contrib. Mineral. Petrol.*, 163, 877-895, 2011.



- 1105 Rosenberg, C.L.: Shear zones and magma ascent: A model based on a review of the  
 1106 Tertiary magmatism in the Alps, *Tectonics*, 23, n/a-n/a, 2004.
- 1107 Schmid, S.M., Casey, M.: Complete fabric analysis of some commonly observed quartz  
 1108 C-axis patterns, *Mineral and Rock Deformation: Laboratory Studies*, pp. 263-286,  
 1109 1986.
- 1110 Schmid, S.M., Pfiffner, O.A., Froitzheim, N., Schönborn, G., Kissling, E.: Geophysical-  
 1111 geological transect and tectonic evolution of the Swiss-Italian Alps, *Tectonics*, 15,  
 1112 1036-1064, 1996.
- 1113 Schmidt, M.W.: Amphibole composition in tonalite as a function of pressure: an  
 1114 experimental calibration of the Al-in-hornblende barometer, *Contrib. Mineral. Petrol.*,  
 1115 110, 304-310, 1992.
- 1116 Scholz, C.H.: Shear heating and the state of stress on faults, *J. Geophys. Res.-Solid Earth*,  
 1117 85, 6174-6184, 1980.
- 1118 Scholz, C.H.: Mechanics of faulting, *Annu. Rev. Earth Planet. Sci.*, 17, 309-334, 1989.
- 1119 Searle, M.P., Yeh, M.W., Lin, T.H., Chung, S.L.: Structural constraints on the timing of  
 1120 left-lateral shear along the Red River shear zone in the Ailao Shan and Diancang  
 1121 Shan Ranges, Yunnan, SW China, *Geosphere*, 6, 316-338, 2010.
- 1122 Sibson, R.H.: Fault rocks and fault mechanisms, *J. Geol. Soc.*, 133, 191-213, 1977.
- 1123 Spruzeniece, L., Piazzolo, S.: Strain localization in brittle-ductile shear zones: fluid  
 1124 abundant vs fluid limited conditions (an example from Wyangala area, Australia),  
 1125 *Solid Earth*, 7, 1399-1446, 2015.
- 1126 Stein, E., Dietl, C.: Hornblende thermobarometry of granitoids from the Central  
 1127 Odenwald (Germany) and their implications for the geotectonic development of the  
 1128 Odenwald, *Mineral. Petrol.*, 72, 185-207, 2001.
- 1129 Stipp, M., Stüënitz, H., Heilbronner, R., Schmid, S.M.: The eastern Tonale fault zone: a  
 1130 'natural laboratory' for crystal plastic deformation of quartz over a temperature range  
 1131 from 250 to 700 °C, *J. Struct. Geol.*, 24, 1861-1884, 2002.
- 1132 Stipp, M., Tullis, J.: The recrystallized grain size piezometer for quartz, *Geophys. Res.*  
 1133 *Lett.*, 30, 2003.
- 1134 Stüënitz, H., Fitz Gerald, J.D., Tullis, J.: Dislocation generation, slip systems, and  
 1135 dynamic recrystallization in experimentally deformed plagioclase single crystals,  
 1136 *Tectonophysics*, 372, 215-233, 2003.
- 1137 Stüënitz, H., J.D., F.G.: Deformation of granitoids at low metamorphic grade II: Granular  
 1138 flow in albite-rich mylonites, *Tectonophysics*, 221, 299-324, 1993.
- 1139 Tang, Y., Wang, D., Liao, S., Wang, B., Yin, F.: Fabrics and <sup>40</sup>Ar/<sup>39</sup>Ar ages of  
 1140 metamorphic rocks in the Gaoligong tectonic belt: Implications for Cenozoic  
 1141 metamorphism and deformation in the SE Tibetan Plateau, *J. Asian Earth Sci.*, 192,  
 1142 2020.



- 1143 Tapponnier, P., Molnar, P.: Active faulting and tectonics of China, *J. Geophys. Res.*, 82,  
 1144 2905-2930, 1977.
- 1145 Tapponnier, P., Peltzer, G., Armijo, R., Le Dain, A.Y., Cobbold, P.: Propagating extrusion  
 1146 tectonics in Asia: new insights from simple experiments with plasticine, *Geology*, 10,  
 1147 611-616, 1982.
- 1148 Tapponnier, P., Lacassin, R., Leloup, P.H., Schärer, U., Zhong, D.L., Liu, X.H., Ji, S.C.,  
 1149 Zhang, L.S., Zhong, J.Y.: The Ailao Shan/Red River metamorphic belt: Tertiary  
 1150 leftlateral shear between Indochina and South China, *Nature*, 343, 431-437, 1990.
- 1151 Tikoff, B., de Saint Blanquat, M.: Transpressional shearing and strike-slip partitioning  
 1152 in the Late Cretaceous Sierra Nevada magmatic arc, California, *Tectonics*, 16, 442-  
 1153 459, 1997.
- 1154 Toy, V.G., Prior, D.J., Norris, R.J.: Quartz fabrics in the Alpine Fault mylonites: Influence  
 1155 of pre-existing preferred orientations on fabric development during progressive uplift,  
 1156 *J. Struct. Geol.*, 30, 602-621, 2008.
- 1157 Tribe, I.R., D'Lemos, R.S.: Significance of a hiatus in down-temperature fabric  
 1158 development within syntectonic quartz diorite complexes, Channel Islands, UK, *J.*  
 1159 *Geol. Soc.*, 153, 127-138, 1996.
- 1160 Tullis, J., Wenk, H.R.: Effect of muscovite on the strength and lattice preferred  
 1161 orientations of experimentally deformed quartz aggregates, *Mater. Sci. Eng. A-Struct.*  
 1162 *Mater. Prop. Microstruct. Process.*, 175, 209-220, 1994.
- 1163 Tullis, J., Yund, R.A.: Transition from cataclastic flow to dislocation creep of feldspar:  
 1164 Mechanisms and microstructures, *Geology*, 15, 606-609, 1987.
- 1165 Tullis, J., Yund, R.A.: Diffusion creep in feldspar aggregates: experimental evidence, *J.*  
 1166 *Struct. Geol.*, 13, 987-1000, 1991.
- 1167 Twiss, R.J.: Static theory of size variations with stress for subgrains and dynamically  
 1168 recrystallized grains, U.S.G.S, Open-file Report, pp. 665-683, 1980.
- 1169 Vannucchi, P.: Scaly fabric and slip within fault zones, *Geosphere*, 15, 342-356, 2019.
- 1170 Vauchez, A.: Egydio-Silva, M., Babinski, M., Tommasi, A., Uhlein, A., Liu, D.,  
 1171 Deformation of a pervasively molten middle crust: insights from the neoproterozoic  
 1172 Ribeira-Araçuaí orogen (SE Brazil), *Terr. Nova*, 19, 278-286, 2007.
- 1173 Wang, W., Song, Z., Tang, Y., Chen, X., Liu, J.: The Ailao Shan–Red River shear zone  
 1174 revisited: Timing and tectonic implications, *Geol. Soc. Am. Bull.*, 132, 1165-1182,  
 1175 2019.
- 1176 Wang, Y., Fan, W., Zhang, Y., Peng, T., Chen, X., Xu, Y.: Kinematics and  $^{40}\text{Ar}/^{39}\text{Ar}$   
 1177 geochronology of the Gaoligong and Chongshan shear systems, western Yunnan,  
 1178 China: Implications for early Oligocene tectonic extrusion of SE Asia,  
 1179 *Tectonophysics*, 418, 235-254, 2006.
- 1180 Wehrens, P., Berger, A., Peters, M., Spillmann, T., Herwegh, M.: Deformation at the





- frictional-viscous transition: Evidence for cycles of fluid-assisted embrittlement and ductile deformation in the granitoid crust, *Tectonophysics*, 693, 66-84, 2016.
- White, S.H., Knipe, R.J.: Transformation- and reaction-enhanced ductility in rocks, *J. Geol. Soc.*, 135, 513-516, 1978.
- Wibberley, C.A.J., Yielding, G., Di Toro, G.: Recent advances in the understanding of fault zone internal structure: a review, *Geological Society, London, Special Publications*, 299, 5-33, 2008.
- Wintsch, R.P., Christoffersen, R., Kronenberg, A.K.: Fluid-rock reaction weakening of fault zones, *J. Geophys. Res.-Solid Earth*, 100, 13021-13032, 1995.
- Wintscha, R.P., Yi, K.: Dissolution and replacement creep: a significant deformation mechanism in mid-crustal rocks, *J. Struct. Geol.*, 24, 1179-1193, 2002.
- Wirth, R., Voll, G.: Cellular intergrowth between quartz and sodium-rich plagioclase (myrmekite) - an analogue of discontinuous precipitation in metal alloys, *J. Mater. Sci.*, 22, 1913-1918, 1987.
- Wise, D.U., Dunn, D.E., Engelder, J.T., Geiser, P.A., Hatcher, R.D., Kish, S.A., Odom, A.L., Schamel, S.: Fault-related rocks: Suggestions for terminology, *Geology*, 12, 391-394, 1984.
- Xia, H.R., Liu, J.L.: The crystallographic preferred orientation of quartz and its applications, *Chin. Sci. Bull.*, 30, 58-70, 2011.
- Xu, Y.G., Yang, Q.J., Lan, J.B., Luo, Z.Y., Huang, X.L., Shi, Y.R., Xie, L.W.: Temporal-spatial distribution and tectonic implications of the batholiths in the Gaoligong-Tengliang-Yingjiang area, western Yunnan: Constraints from zircon U-Pb ages and Hf isotopes, *J. Asian Earth Sci.*, 53, 151-175, 2012.
- Xu, Z., Wang, Q., Cai, Z., Dong, H., Li, H., Chen, X., Duan, X., Cao, H., Li, J., Burg, J.-P.: Kinematics of the Tengchong Terrane in SE Tibet from the late Eocene to early Miocene: Insights from coeval mid-crustal detachments and strike-slip shear zones, *Tectonophysics*, 665, 127-148, 2015.
- Yamasaki, T., Wright, T.J., Houseman, G.A.: Weak ductile shear zone beneath a major strike-slip fault: Inferences from earthquake cycle model constrained by geodetic observations of the western North Anatolian Fault Zone, *J. Geophys. Res.-Solid Earth*, 119, 3678-3699, 2014.
- Zhang, B., Chai, Z., Yin, C.Y., Huang, W.T., Wang, Y., Zhang, J.J., Wang, X.X., Cao, K.: Intra-continental transpression and gneiss doming in an obliquely convergent regime in SE Asia, *J. Struct. Geol.*, 97, 48-70, 2017.
- Zhang, B., Zhang, J., Chang, Z., Wang, X., Cai, F., Lai, Q.: The Biluoxueshan transpressive deformation zone monitored by synkinematic plutons, around the Eastern Himalayan Syntaxis, *Tectonophysics*, 574-575, 158-180, 2012a.
- Zhang, B., Zhang, J., Zhong, D., Yang, L., Yue, Y., Yan, S.: Polystage deformation of the



- 1219 Gaoligong metamorphic zone: Structures,  $^{40}\text{Ar}/^{39}\text{Ar}$  mica ages, and tectonic  
 1220 implications, *J. Struct. Geol.*, 37, 1-18, 2012b.
- 1221 Zhang, J., Peng, T., Fan, W., Zhao, G., Dong, X., Gao, J., Peng, B., Wei, C., Xia, X.,  
 1222 Chen, L., Liang, X.: Petrogenesis of the Early Cretaceous granitoids and its mafic  
 1223 enclaves in the Northern Tengchong Terrane, southern margin of the Tibetan Plateau  
 1224 and its tectonic implications, *Lithos*, 318-319, 283-298, 2018.
- 1225 Zhu, R.Z., Lai, S.C., Qin, J.F., Zhao, S.W., Wang, J.B.: Late Early-Cretaceous quartz  
 1226 diorite–granodiorite–monzogranite association from the Gaoligong belt,  
 1227 southeastern Tibet Plateau: Chemical variations and geodynamic implications,  
 1228 *Lithos*, 288-289, 311-325, 2017.
- 1229
